# Supplementary material
Source: PubMed Central journal article supplement (PMC2771318)
Supplement: NIHMS147823-supplement-1_si_001.pdf [file NIHMS147823-supplement-1_si_001.pdf]

# Conformational preferences of the phenylalanine cyclohexane analogue 1- amino-2-phenylcyclohexanecarboxylic acid

Carlos Alemán<sup>1,2,\*</sup> Ana I. Jiménez,<sup>3</sup> Carlos Cativiela,<sup>3</sup>  
Ruth Nussinov<sup>4,5</sup> and Jordi Casanovas<sup>6,\*</sup>

<sup>1</sup> *Departament d'Enginyeria Química, E. T. S. d'Enginyeria Industrial de Barcelona, Universitat Politècnica de Catalunya, Diagonal 647, Barcelona E-08028, Spain*

<sup>2</sup> *Center for Research in Nano-Engineering, Universitat Politècnica de Catalunya, Campus Sud, Edifici C', C/Pasqual i Vila s/n, Barcelona E-08028, Spain*

<sup>3</sup> *Departamento de Química Orgánica, Instituto de Ciencia de Materiales de Aragón, Universidad de Zaragoza – CSIC, 50009 Zaragoza, Spain*

<sup>4</sup> *Basic Research Program, SAIC-Frederick, Inc. Center for Cancer Research Nanobiology Program, NCI, Frederick, MD 21702, USA*

<sup>5</sup> *Department of Human Genetics Sackler, Medical School, Tel Aviv University, Tel Aviv 69978, Israel*

<sup>6</sup> *Departament de Química, Escola Politècnica Superior, Universitat de Lleida, c/Jaume II n° 69, Lleida E-25001, Spain*

|          | Pages  | Contents                                                                                                        |
|----------|--------|-----------------------------------------------------------------------------------------------------------------|
| Table S1 | S2-S30 | Coordinates and energies of Ac- <i>c</i> -L-c <sub>6</sub> Phe-NHMe and Ac- <i>t</i> -L-c <sub>6</sub> Phe-NHMe |

**Table S1. Atomic Coordinates (in Å), energies (in atomic units) and free energies (in atomic units) of the minimum energy conformations calculated for Ac-*c*-L-c<sub>6</sub>Phe-NHMe and Ac-*t*-L-c<sub>6</sub>Phe-NHMe.**

**Ac-*c*-L-c<sub>6</sub>Phe-NHMe**

1

E= -880.353232 a.u.

|   |             |             |             |
|---|-------------|-------------|-------------|
| C | 0.38552300  | 0.69692700  | -0.09480000 |
| C | 0.92000400  | 0.97450300  | 1.30008400  |
| N | 1.01239400  | -0.10488500 | 2.12121500  |
| C | 1.39503100  | -0.17797800 | 3.54746000  |
| C | 2.91367600  | 0.09239600  | 3.80642200  |
| N | 3.51334900  | 1.00577200  | 3.00824800  |
| C | 4.87994000  | 1.43541300  | 3.27274500  |
| H | 1.08886700  | 1.10166700  | -0.82715100 |
| H | 0.21674100  | -0.36323900 | -0.30160000 |
| H | -0.55934500 | 1.23563400  | -0.21551600 |
| O | 1.24537700  | 2.12207400  | 1.63196300  |
| H | 0.88480200  | -1.00375200 | 1.67518700  |
| C | 1.02252400  | -1.62513900 | 4.05014600  |
| C | -0.50594900 | -1.80277000 | 4.20059700  |
| O | 3.49814700  | -0.45299000 | 4.74575300  |
| H | 2.92039500  | 1.59070500  | 2.42278300  |
| H | 5.20962200  | 2.07242000  | 2.44962800  |
| H | 4.95602500  | 1.99248000  | 4.21440900  |
| H | 5.53835900  | 0.56654000  | 3.34270600  |
| C | -1.15263700 | -0.73166600 | 5.08471500  |
| C | -0.85895900 | 0.66348700  | 4.52719600  |
| H | 1.46729200  | -1.67899100 | 5.04805400  |
| H | -0.99689800 | -1.77149800 | 3.21935500  |
| H | -0.69381600 | -2.80349300 | 4.60653200  |
| H | -2.23366200 | -0.90581800 | 5.14741200  |
| H | -0.76013400 | -0.80830900 | 6.10875800  |
| H | -1.33941000 | 0.78022500  | 3.54634800  |
| H | -1.28325500 | 1.43976500  | 5.17503200  |
| C | 0.64982500  | 0.89085800  | 4.40455600  |
| H | 0.85801000  | 1.88032800  | 3.99215600  |
| H | 1.10029500  | 0.85065200  | 5.40389500  |
| C | 1.65395500  | -2.75162400 | 3.22398400  |
| C | 2.94243300  | -3.22106900 | 3.53796900  |
| C | 0.97859900  | -3.37177600 | 2.15658300  |
| C | 3.53474400  | -4.25090100 | 2.80531200  |
| H | 3.48184400  | -2.75980100 | 4.35777100  |
| C | 1.57275400  | -4.40022200 | 1.41653500  |
| H | -0.03850400 | -3.08272400 | 1.90696900  |
| C | 2.85635200  | -4.84298900 | 1.73601700  |
| H | 4.53024800  | -4.59314400 | 3.07437700  |
| H | 1.02274300  | -4.86012100 | 0.60002300  |
| H | 3.31799300  | -5.64512500 | 1.16742900  |

2

E= -880.3476484 a.u.

|   |             |             |            |
|---|-------------|-------------|------------|
| C | -0.05130400 | -0.57878600 | 0.09436200 |
| C | -0.12521900 | -0.16558800 | 1.55443100 |
| N | 1.06745300  | -0.06724400 | 2.19945600 |
| C | 1.32168200  | 0.18315600  | 3.64173700 |
| C | 1.00744000  | 1.69891900  | 3.94573100 |
| N | -0.29318900 | 2.05803200  | 3.84288800 |
| C | -0.69455000 | 3.44707400  | 4.01487000 |

|   |             |             |             |
|---|-------------|-------------|-------------|
| H | -0.53043400 | 0.19504500  | -0.51182800 |
| H | 0.96648300  | -0.74259500 | -0.26931700 |
| H | -0.62822800 | -1.49927300 | -0.03324800 |
| O | -1.22106800 | 0.06662800  | 2.08272000  |
| H | 1.88659400  | -0.30473700 | 1.65625000  |
| C | 2.85906100  | -0.03918700 | 3.89444100  |
| C | 3.18761700  | -0.06081200 | 5.41507800  |
| O | 1.88946800  | 2.49861100  | 4.26415800  |
| H | -0.92869700 | 1.41047200  | 3.37701700  |
| H | -1.78430400 | 3.50075100  | 3.97553600  |
| H | -0.34933200 | 3.82303000  | 4.98138600  |
| H | -0.27265900 | 4.09158000  | 3.23437500  |
| C | 2.27880100  | -0.94905500 | 6.27612800  |
| C | 0.80001300  | -0.63859300 | 6.01350500  |
| H | 3.33677200  | 0.86737900  | 3.51256900  |
| H | 4.23609300  | -0.35674900 | 5.53422500  |
| H | 3.10585900  | 0.97116200  | 5.76986500  |
| H | 2.47189900  | -2.01171200 | 6.08117900  |
| H | 2.51869900  | -0.78690400 | 7.33407300  |
| H | 0.15584400  | -1.31897600 | 6.58299700  |
| H | 0.56740300  | 0.37558800  | 6.36519800  |
| C | 0.45800600  | -0.75566200 | 4.52184500  |
| H | 0.62907500  | -1.78314000 | 4.18008100  |
| H | -0.60071600 | -0.55346600 | 4.35586100  |
| C | 3.48633700  | -1.19740400 | 3.11891400  |
| C | 4.43084300  | -0.89150200 | 2.12163800  |
| C | 3.20853100  | -2.55797800 | 3.34667700  |
| C | 5.06967000  | -1.89096000 | 1.38077700  |
| H | 4.67939500  | 0.15022900  | 1.93189600  |
| C | 3.84404500  | -3.56051700 | 2.61039900  |
| H | 2.49298500  | -2.84986600 | 4.10528500  |
| C | 4.77680200  | -3.23386400 | 1.62220500  |
| H | 5.79689900  | -1.61670100 | 0.62165200  |
| H | 3.60837100  | -4.60182900 | 2.81202100  |
| H | 5.26962500  | -4.01615900 | 1.05240600  |

3

E= -880.3468163 a.u.

|   |             |             |             |
|---|-------------|-------------|-------------|
| C | -0.21522800 | -1.17125400 | 0.19013700  |
| C | -0.22016500 | -0.64833900 | 1.61627400  |
| N | 1.00166800  | -0.42946400 | 2.16781200  |
| C | 1.33545300  | -0.03265800 | 3.55331600  |
| C | 0.99209700  | 1.47485200  | 3.83321700  |
| N | -0.22456000 | 1.89161300  | 3.42002100  |
| C | -0.68929800 | 3.24260900  | 3.69838900  |
| H | -0.68229100 | -2.16084800 | 0.18429800  |
| H | -0.83362900 | -0.51391600 | -0.42681200 |
| H | 0.78285000  | -1.24760100 | -0.24920500 |
| O | -1.28901100 | -0.44232100 | 2.20741900  |
| H | 1.79563500  | -0.50215400 | 1.54399900  |
| C | 2.88862600  | -0.24647200 | 3.76529300  |
| C | 3.16793000  | -1.65456400 | 4.32562100  |
| O | 1.77141800  | 2.21612100  | 4.43930200  |
| H | -0.86642400 | 1.20559800  | 3.02394200  |
| H | -0.78253700 | 3.42040200  | 4.77573000  |
| H | 0.01076400  | 3.98105400  | 3.29705800  |
| H | -1.66421100 | 3.37744300  | 3.22599400  |
| C | 2.59658500  | -1.80429600 | 5.75194800  |
| C | 1.27035500  | -1.02607800 | 5.91474300  |
| H | 3.15016900  | 0.47732600  | 4.54176400  |
| H | 2.73257800  | -2.41794400 | 3.66805200  |

|   |             |             |             |
|---|-------------|-------------|-------------|
| H | 4.24780900  | -1.83583000 | 4.33292300  |
| H | 2.43991600  | -2.86819500 | 5.96714200  |
| H | 3.32941500  | -1.44373400 | 6.48348500  |
| H | 0.62131400  | -1.52341300 | 6.64365900  |
| H | 1.46230900  | -0.02187100 | 6.31043400  |
| C | 0.53884500  | -0.91219600 | 4.57270600  |
| H | 0.41419700  | -1.90945600 | 4.13537200  |
| H | -0.46706300 | -0.51004100 | 4.70371100  |
| C | 3.73861400  | 0.11585100  | 2.54941600  |
| C | 4.19200500  | -0.85326700 | 1.63695000  |
| C | 4.09952900  | 1.45594500  | 2.31990000  |
| C | 4.97176600  | -0.49754700 | 0.53024700  |
| H | 3.95479000  | -1.90147200 | 1.79531100  |
| C | 4.87846100  | 1.81201500  | 1.21744000  |
| H | 3.76057500  | 2.21545800  | 3.01758400  |
| C | 5.31621400  | 0.83767300  | 0.31485200  |
| H | 5.31438300  | -1.26775900 | -0.15535400 |
| H | 5.14832500  | 2.85359000  | 1.06630200  |
| H | 5.92508800  | 1.11567400  | -0.54062600 |

4

E= -880.3488609 a.u.

|   |             |             |             |
|---|-------------|-------------|-------------|
| C | 0.45602100  | -0.27479300 | -0.11543300 |
| C | 0.28112500  | 0.07368800  | 1.35159900  |
| N | 1.36155100  | -0.14825300 | 2.14626500  |
| C | 1.54162400  | 0.19041400  | 3.58089600  |
| C | 0.64329200  | -0.78376700 | 4.43514100  |
| N | -0.69667200 | -0.61859300 | 4.32227500  |
| C | -1.61077300 | -1.53604000 | 4.98850100  |
| H | 0.41064900  | 0.65144200  | -0.69631700 |
| H | 1.39643500  | -0.78564600 | -0.33918300 |
| H | -0.38102200 | -0.90381400 | -0.42847700 |
| O | -0.79036000 | 0.53568700  | 1.76514800  |
| H | 2.17223100  | -0.55282100 | 1.69888200  |
| C | 1.18338200  | 1.69435500  | 3.87753700  |
| C | 1.62520800  | 2.06252600  | 5.32049700  |
| O | 1.14276500  | -1.64449100 | 5.16102300  |
| H | -1.03494000 | -0.06976600 | 3.53233500  |
| H | -2.63134500 | -1.17635200 | 4.84303700  |
| H | -1.52623800 | -2.55505400 | 4.59173500  |
| H | -1.39079600 | -1.57483700 | 6.05816900  |
| C | 3.10094600  | 1.77735000  | 5.63033500  |
| C | 3.46294800  | 0.31861000  | 5.31344600  |
| H | 0.09441500  | 1.75965300  | 3.87419100  |
| H | 1.39246400  | 3.11930600  | 5.49253900  |
| H | 1.00087700  | 1.48878500  | 6.01887900  |
| H | 3.74222000  | 2.46614500  | 5.06841100  |
| H | 3.29434600  | 1.98187700  | 6.69034400  |
| H | 4.54549600  | 0.16759300  | 5.40531000  |
| H | 2.98661900  | -0.34464100 | 6.04063700  |
| C | 3.02276400  | -0.11528500 | 3.90497400  |
| H | 3.63973300  | 0.38608200  | 3.15025700  |
| H | 3.18153300  | -1.19345100 | 3.79860700  |
| C | 1.63398600  | 2.70391900  | 2.81819300  |
| C | 0.63786600  | 3.45155400  | 2.16520100  |
| C | 2.97000700  | 2.97548300  | 2.47163400  |
| C | 0.95254800  | 4.42591900  | 1.21542300  |
| H | -0.40462600 | 3.25252200  | 2.39504800  |
| C | 3.29149500  | 3.94659800  | 1.51853300  |
| H | 3.78259600  | 2.43800800  | 2.94300000  |
| C | 2.28554900  | 4.67880200  | 0.88505900  |

|   |            |            |            |
|---|------------|------------|------------|
| H | 0.15386500 | 4.98293600 | 0.73332500 |
| H | 4.33467600 | 4.13120400 | 1.27649200 |
| H | 2.53730100 | 5.43496500 | 0.14697400 |

5

E= -880.346982 a.u.

|   |             |             |             |
|---|-------------|-------------|-------------|
| C | 0.49303500  | -0.13370700 | -0.26015700 |
| C | 0.18834800  | -0.43565500 | 1.20039700  |
| N | 1.19267700  | -0.13287800 | 2.07285400  |
| C | 1.32582100  | -0.09143700 | 3.55488000  |
| C | 0.77888200  | -1.31254500 | 4.36171800  |
| N | -0.02336500 | -2.20809700 | 3.75629500  |
| C | -0.58111000 | -3.31715200 | 4.51776000  |
| H | -0.26441900 | 0.56339400  | -0.62989500 |
| H | 1.48441600  | 0.29267600  | -0.43631300 |
| H | 0.39296200  | -1.05857200 | -0.83465500 |
| O | -0.89585700 | -0.94121700 | 1.50411600  |
| H | 2.01257200  | 0.23724200  | 1.61488300  |
| C | 0.70545500  | 1.22550400  | 4.17134100  |
| C | 1.43246800  | 2.48272200  | 3.65098700  |
| O | 1.12495900  | -1.41657000 | 5.54376700  |
| H | -0.49285700 | -1.91593200 | 2.89471700  |
| H | -1.09134500 | -3.98977300 | 3.82530400  |
| H | 0.21717100  | -3.85957000 | 5.02969500  |
| H | -1.29421800 | -2.97176900 | 5.27610000  |
| C | 2.93745200  | 2.44667200  | 3.94780000  |
| C | 3.58507300  | 1.19000300  | 3.35457200  |
| H | 0.94136700  | 1.13533000  | 5.23834600  |
| H | 1.28070600  | 2.59374300  | 2.56906400  |
| H | 0.97530800  | 3.36371800  | 4.11525500  |
| H | 3.42185500  | 3.34911600  | 3.55592000  |
| H | 3.09228900  | 2.45214000  | 5.03557400  |
| H | 3.59618500  | 1.27048800  | 2.25554300  |
| H | 4.63922900  | 1.12176800  | 3.64792800  |
| C | 2.86297300  | -0.08149100 | 3.82312200  |
| H | 3.30121900  | -0.97333600 | 3.35815300  |
| H | 2.98992700  | -0.19385700 | 4.90170400  |
| C | -0.81223700 | 1.32458000  | 4.07147500  |
| C | -1.60676800 | 0.77854200  | 5.09321000  |
| C | -1.46041300 | 1.97274300  | 3.00979400  |
| C | -2.99980500 | 0.86216800  | 5.04777000  |
| H | -1.12504400 | 0.28328100  | 5.93219500  |
| C | -2.85364800 | 2.06008000  | 2.96047900  |
| H | -0.88045800 | 2.41816100  | 2.20740300  |
| C | -3.63035000 | 1.50277600  | 3.97813100  |
| H | -3.59090400 | 0.43235400  | 5.85181700  |
| H | -3.33134700 | 2.56373900  | 2.12462800  |
| H | -4.71378400 | 1.57132700  | 3.94085500  |

6

E= -880.3476922 a.u.

|   |             |             |             |
|---|-------------|-------------|-------------|
| C | -0.44198100 | 0.07329900  | 0.32314900  |
| C | -0.11681000 | -0.36986000 | 1.73978800  |
| N | 1.19351100  | -0.17169800 | 2.11919200  |
| C | 1.63375600  | -0.14410700 | 3.51687200  |
| C | 0.93798200  | 1.08142200  | 4.19598900  |
| N | 0.89142400  | 1.09717700  | 5.55952600  |
| C | 0.21679700  | 2.17938800  | 6.26717000  |
| H | -0.83585400 | 1.09494700  | 0.36529100  |
| H | 0.42764900  | 0.06496300  | -0.34085300 |

|   |             |             |             |
|---|-------------|-------------|-------------|
| H | -1.21972500 | -0.57670800 | -0.08111900 |
| O | -0.96720100 | -0.87228700 | 2.46808500  |
| H | 1.68387700  | 0.49523700  | 1.53558200  |
| C | 3.20494900  | 0.05930000  | 3.53757100  |
| C | 3.92456700  | -1.16316600 | 2.91952800  |
| O | 0.51343400  | 2.01889000  | 3.52810500  |
| H | 1.06461100  | 0.24105700  | 6.06222300  |
| H | 0.42792300  | 2.08713900  | 7.33477100  |
| H | 0.58811000  | 3.14081000  | 5.90660300  |
| H | -0.86725700 | 2.15344600  | 6.10705300  |
| C | 3.54353200  | -2.48410200 | 3.59966600  |
| C | 2.02372200  | -2.68567800 | 3.60341100  |
| H | 3.46478300  | 0.08369400  | 4.60366200  |
| H | 3.68409400  | -1.23713800 | 1.85302300  |
| H | 5.00584000  | -0.99539800 | 2.98670900  |
| H | 4.04374900  | -3.31841300 | 3.09328100  |
| H | 3.91278000  | -2.48145200 | 4.63603400  |
| H | 1.65940100  | -2.82504700 | 2.57884000  |
| H | 1.75815000  | -3.59282300 | 4.15907300  |
| C | 1.31773400  | -1.48271800 | 4.23923600  |
| H | 0.23763900  | -1.63118200 | 4.26206400  |
| H | 1.67684000  | -1.40638500 | 5.27525400  |
| C | 3.68537600  | 1.38111300  | 2.94603300  |
| C | 3.87029600  | 2.49153800  | 3.78532200  |
| C | 3.97695900  | 1.53885300  | 1.58068900  |
| C | 4.31211500  | 3.71614200  | 3.28372000  |
| H | 3.66090800  | 2.39389100  | 4.84744000  |
| C | 4.41567700  | 2.76515300  | 1.07161500  |
| H | 3.88700700  | 0.69707100  | 0.90004400  |
| C | 4.58272400  | 3.86024100  | 1.92046900  |
| H | 4.44440700  | 4.55784300  | 3.95764000  |
| H | 4.63365300  | 2.85855000  | 0.01137300  |
| H | 4.92595900  | 4.81231500  | 1.52650200  |

7

E= -880.34425 a.u.

|   |             |             |             |
|---|-------------|-------------|-------------|
| C | 0.48357900  | 0.42430000  | -0.20762400 |
| C | 0.17655400  | 0.11718200  | 1.25335900  |
| N | 1.27042700  | 0.08679700  | 2.06005800  |
| C | 1.43106600  | -0.11569300 | 3.50656400  |
| C | 2.98667000  | 0.03567800  | 3.68399200  |
| N | 3.49187400  | -0.09309100 | 4.93453300  |
| C | 4.91811500  | 0.06896000  | 5.19141300  |
| H | -0.05283000 | 1.33561300  | -0.48810000 |
| H | 1.54736300  | 0.55464000  | -0.42241000 |
| H | 0.08956400  | -0.38866800 | -0.82385200 |
| O | -0.98555900 | -0.08417900 | 1.61302700  |
| H | 2.17499300  | 0.23885000  | 1.61996800  |
| C | 0.98539200  | -1.54286700 | 4.03099000  |
| C | -0.53815000 | -1.66060100 | 4.26794400  |
| O | 3.72640600  | 0.27693700  | 2.72721900  |
| H | 2.87369800  | -0.24720900 | 5.71456200  |
| H | 5.10776900  | -0.13701600 | 6.24638000  |
| H | 5.49734500  | -0.62490100 | 4.57629300  |
| H | 5.24648900  | 1.08654900  | 4.95680500  |
| C | -1.06916300 | -0.54159400 | 5.17343200  |
| C | -0.76047900 | 0.83986500  | 4.58372700  |
| H | 1.43874200  | -1.62879500 | 5.02797200  |
| H | -1.07273200 | -1.62788000 | 3.31747500  |
| H | -0.72658200 | -2.64001400 | 4.72462800  |
| H | -2.15057300 | -0.65998500 | 5.30906300  |

|   |             |             |            |
|---|-------------|-------------|------------|
| H | -0.61891800 | -0.62817400 | 6.17561700 |
| H | -1.30522700 | 0.96069500  | 3.64514600 |
| H | -1.09323500 | 1.63030800  | 5.26854100 |
| C | 0.74669600  | 1.01204800  | 4.34535500 |
| H | 0.96060800  | 1.96879400  | 3.85575100 |
| H | 1.23526600  | 1.05408400  | 5.32742000 |
| C | 1.55080300  | -2.69351300 | 3.20904600 |
| C | 2.69379600  | -3.37864600 | 3.64917900 |
| C | 0.94687600  | -3.11892400 | 2.01439400 |
| C | 3.22777900  | -4.44498900 | 2.92073500 |
| H | 3.17285400  | -3.07567300 | 4.57699500 |
| C | 1.47673100  | -4.18458800 | 1.28336700 |
| H | 0.05160400  | -2.62206700 | 1.65579700 |
| C | 2.62092200  | -4.85091500 | 1.73071200 |
| H | 4.11311200  | -4.95815300 | 3.28588000 |
| H | 0.99040000  | -4.49706300 | 0.36332400 |
| H | 3.03010500  | -5.68063500 | 1.16149100 |

8

E= -880.347474 a.u.

|   |             |             |             |
|---|-------------|-------------|-------------|
| C | 0.00000000  | 0.00000000  | 0.00000000  |
| C | 0.00000000  | 0.00000000  | 1.51924200  |
| N | 1.24193900  | 0.00000000  | 2.11265000  |
| C | 1.46561900  | 0.29202700  | 3.54271800  |
| C | 0.67184500  | -0.74088900 | 4.40462400  |
| N | 0.69038400  | -2.02231600 | 3.94263300  |
| C | -0.08930600 | -3.06185400 | 4.59997000  |
| H | -0.14580700 | 1.02872200  | -0.34697600 |
| H | 0.92924000  | -0.38247000 | -0.43296800 |
| H | -0.84232500 | -0.59819900 | -0.35239200 |
| O | -1.03841200 | -0.01025500 | 2.17208300  |
| H | 2.02707200  | 0.18887800  | 1.50287400  |
| C | 1.01403600  | 1.75387500  | 3.92610100  |
| C | 1.59845800  | 2.21772000  | 5.29382900  |
| O | 0.16003500  | -0.43850700 | 5.47831900  |
| H | 0.94563000  | -2.15670800 | 2.97499600  |
| H | 0.22893500  | -4.03614500 | 4.22182200  |
| H | 0.08528900  | -3.01916200 | 5.67649100  |
| H | -1.16415500 | -2.93575400 | 4.42177500  |
| C | 3.08960300  | 1.92399300  | 5.51430500  |
| C | 3.41688800  | 0.45370100  | 5.22040200  |
| H | -0.06640500 | 1.68710100  | 4.07122300  |
| H | 1.40703500  | 3.29177600  | 5.39993100  |
| H | 1.02810300  | 1.70651200  | 6.07322500  |
| H | 3.71516400  | 2.57169900  | 4.88656500  |
| H | 3.35207500  | 2.16424500  | 6.55173200  |
| H | 4.49269800  | 0.26912700  | 5.32583500  |
| H | 2.91203600  | -0.18923000 | 5.95151200  |
| C | 2.97986200  | 0.06291100  | 3.80276500  |
| H | 3.54679200  | 0.66066500  | 3.07579900  |
| H | 3.21811900  | -0.98760100 | 3.60186900  |
| C | 1.22094500  | 2.77347000  | 2.80723900  |
| C | 0.08477300  | 3.34469700  | 2.20787400  |
| C | 2.47824600  | 3.21127400  | 2.35215100  |
| C | 0.19216100  | 4.30675700  | 1.19992700  |
| H | -0.90001500 | 3.02461900  | 2.53700600  |
| C | 2.59237300  | 4.17038700  | 1.34114300  |
| H | 3.38766300  | 2.81710800  | 2.79058000  |
| C | 1.44988300  | 4.72342100  | 0.75806200  |
| H | -0.70831100 | 4.73017700  | 0.76330500  |
| H | 3.57882000  | 4.48952300  | 1.01539800  |

|   |            |            |             |
|---|------------|------------|-------------|
| H | 1.53947600 | 5.47191300 | -0.02398800 |
|---|------------|------------|-------------|

9

E= -880.3439793 a.u.

|   |             |             |             |
|---|-------------|-------------|-------------|
| C | -0.21215500 | -0.33286100 | 0.22437000  |
| C | -0.08053100 | 0.22569700  | 1.63342400  |
| N | 1.13926200  | 0.03026600  | 2.23582900  |
| C | 1.40166800  | 0.27024100  | 3.67061900  |
| C | 1.15976400  | 1.77784300  | 3.99431900  |
| N | 1.51688700  | 2.65825500  | 3.01763900  |
| C | 1.25206300  | 4.08240800  | 3.16532200  |
| H | -0.58952400 | 0.45528100  | -0.43229300 |
| H | 0.72255400  | -0.72796700 | -0.18351400 |
| H | -0.95889200 | -1.13298100 | 0.23678100  |
| O | -0.99987800 | 0.83179300  | 2.17484700  |
| H | 1.78283300  | -0.59775700 | 1.77154600  |
| C | 2.93823700  | -0.00236100 | 3.92970000  |
| C | 3.23687100  | -0.06003300 | 5.45296600  |
| O | 0.76876900  | 2.14889100  | 5.09741600  |
| H | 1.63768200  | 2.28711300  | 2.08671000  |
| H | 1.79522000  | 4.62606500  | 2.38883500  |
| H | 0.18136500  | 4.30560400  | 3.08381400  |
| H | 1.59591500  | 4.41606800  | 4.14610700  |
| C | 2.35809600  | -1.05157000 | 6.22550600  |
| C | 0.87056700  | -0.73012000 | 6.02852400  |
| H | 3.46122500  | 0.88022600  | 3.54591800  |
| H | 4.29906600  | -0.29568700 | 5.58535400  |
| H | 3.07694700  | 0.94262200  | 5.86634300  |
| H | 2.57835900  | -2.07903800 | 5.90993600  |
| H | 2.61192100  | -1.00124500 | 7.29131200  |
| H | 0.25046400  | -1.50465700 | 6.49731600  |
| H | 0.63723300  | 0.21621700  | 6.52241200  |
| C | 0.47713500  | -0.62280300 | 4.54435700  |
| H | 0.47627100  | -1.62075200 | 4.08960400  |
| H | -0.54229000 | -0.24031000 | 4.45603000  |
| C | 3.54868300  | -1.17917400 | 3.16487300  |
| C | 4.67483000  | -0.92716900 | 2.35988600  |
| C | 3.08816600  | -2.50772800 | 3.23105300  |
| C | 5.32386600  | -1.94868700 | 1.66197300  |
| H | 5.05366700  | 0.08939600  | 2.28561500  |
| C | 3.73013400  | -3.53253400 | 2.52983600  |
| H | 2.22110500  | -2.75618100 | 3.82995200  |
| C | 4.85239600  | -3.26040200 | 1.74421000  |
| H | 6.19411200  | -1.71687500 | 1.05440200  |
| H | 3.34986300  | -4.54760000 | 2.60273700  |
| H | 5.35076800  | -4.05935800 | 1.20316700  |

10

E= -880.343258 a.u.

|   |             |             |             |
|---|-------------|-------------|-------------|
| C | 0.40640700  | 0.65155600  | -0.18666000 |
| C | 0.21705900  | -0.02392000 | 1.16789300  |
| N | 1.29470800  | 0.08462300  | 2.00952400  |
| C | 1.47186800  | -0.17964700 | 3.46506100  |
| C | 3.01534800  | -0.16786100 | 3.71890000  |
| N | 3.81700800  | -0.50680400 | 2.66577500  |
| C | 5.25021600  | -0.69204300 | 2.86158100  |
| H | -0.31787200 | 1.46782100  | -0.26967400 |
| H | 1.41018100  | 1.05110900  | -0.35740500 |
| H | 0.17152000  | -0.07384900 | -0.96964600 |
| O | -0.82443400 | -0.62355200 | 1.41726600  |



|   |             |             |            |
|---|-------------|-------------|------------|
| H | 2.00295200  | 0.71751500  | 1.66127300 |
| C | 0.97328300  | -1.57303000 | 4.02810100 |
| C | -0.55020300 | -1.66204800 | 4.27983800 |
| O | 3.47484300  | 0.12502800  | 4.81895500 |
| H | 3.38025300  | -1.00660700 | 1.90236200 |
| H | 5.73666100  | -0.74173300 | 1.88507400 |
| H | 5.64832000  | 0.15472900  | 3.42256200 |
| H | 5.46850500  | -1.60847700 | 3.42272800 |
| C | -1.07359700 | -0.47320600 | 5.09762200 |
| C | -0.68063400 | 0.86180100  | 4.45198800 |
| H | 1.43676600  | -1.57502600 | 5.02334400 |
| H | -1.08580000 | -1.71179000 | 3.33185800 |
| H | -0.73583500 | -2.59955300 | 4.81842000 |
| H | -2.16372700 | -0.54480900 | 5.19158200 |
| H | -0.66603400 | -0.51400500 | 6.11874400 |
| H | -1.17326700 | 0.95615700  | 3.47783400 |
| H | -1.02946800 | 1.69939600  | 5.06863400 |
| C | 0.84239600  | 0.96554200  | 4.30221700 |
| H | 1.12680200  | 1.92230800  | 3.84659700 |
| H | 1.31216300  | 0.94040300  | 5.29006400 |
| C | 1.52779800  | -2.79289800 | 3.30221400 |
| C | 2.59385800  | -3.50990900 | 3.87103300 |
| C | 0.99205400  | -3.25790700 | 2.08946300 |
| C | 3.12054600  | -4.64464900 | 3.24823400 |
| H | 3.01486500  | -3.17566100 | 4.81645300 |
| C | 1.51844100  | -4.39152000 | 1.46299200 |
| H | 0.15295100  | -2.73778500 | 1.63979000 |
| C | 2.58574700  | -5.08850600 | 2.03627000 |
| H | 3.94185800  | -5.18307600 | 3.71332100 |
| H | 1.08485700  | -4.73516700 | 0.52759900 |
| H | 2.98833600  | -5.97244300 | 1.54972100 |

11

E= -880.3443322 a.u.

|   |             |             |             |
|---|-------------|-------------|-------------|
| C | 0.66913500  | -0.74798700 | -0.15076600 |
| C | 0.49152400  | -0.71053400 | 1.35866900  |
| N | 1.40168200  | 0.06150000  | 2.03750300  |
| C | 1.62506600  | 0.01416300  | 3.49530100  |
| C | 1.38117000  | -1.46175000 | 3.96928700  |
| N | 0.46385900  | -1.68688700 | 4.94551100  |
| C | 0.15250800  | -3.05939400 | 5.32992100  |
| H | -0.31520000 | -0.72167800 | -0.62265500 |
| H | 1.28240000  | 0.06992300  | -0.54116700 |
| H | 1.14310900  | -1.69854800 | -0.41814400 |
| O | -0.40583300 | -1.33032500 | 1.91854800  |
| H | 2.17482900  | 0.41012900  | 1.48872100  |
| C | 0.85692500  | 1.15214100  | 4.27126100  |
| C | 1.38020500  | 2.55138900  | 3.84664300  |
| O | 2.10015200  | -2.35211600 | 3.52225300  |
| H | -0.28730900 | -1.01572700 | 5.03084100  |
| H | -0.51116800 | -3.03778400 | 6.19719100  |
| H | -0.33099400 | -3.60503300 | 4.51105900  |
| H | 1.07334300  | -3.58298100 | 5.59296300  |
| C | 2.88591400  | 2.72379600  | 4.07056800  |
| C | 3.66932500  | 1.62440700  | 3.34831800  |
| H | 1.15019300  | 1.01267300  | 5.32044700  |
| H | 1.14215100  | 2.71675700  | 2.78792600  |
| H | 0.82422200  | 3.30928400  | 4.40936900  |
| H | 3.20607600  | 3.71646500  | 3.73151200  |
| H | 3.10181800  | 2.67478300  | 5.14765600  |
| H | 3.60014600  | 1.78130500  | 2.26139700  |

|   |             |             |            |
|---|-------------|-------------|------------|
| H | 4.73779300  | 1.68429100  | 3.58723700 |
| C | 3.15156500  | 0.23388600  | 3.73602200 |
| H | 3.68486400  | -0.55914000 | 3.20556800 |
| H | 3.34100100  | 0.07361400  | 4.80481400 |
| C | -0.66955500 | 1.17018100  | 4.25247000 |
| C | -1.37666600 | 1.04011700  | 5.46012200 |
| C | -1.40994100 | 1.42463100  | 3.08694400 |
| C | -2.77202200 | 1.12703500  | 5.50245700 |
| H | -0.82637000 | 0.88058600  | 6.38556700 |
| C | -2.80164800 | 1.51185000  | 3.12311500 |
| H | -0.89668500 | 1.55394200  | 2.14118900 |
| C | -3.49132500 | 1.35893800  | 4.32959000 |
| H | -3.29012300 | 1.01998200  | 6.45139200 |
| H | -3.35025800 | 1.69730300  | 2.20403800 |
| H | -4.57505300 | 1.42582100  | 4.35394900 |

12

E= -880.3410094 a.u.

|   |             |             |             |
|---|-------------|-------------|-------------|
| C | -0.50457300 | 0.77998100  | 0.19967100  |
| C | -0.28850700 | 0.90223000  | 1.70243500  |
| N | 0.92079100  | 0.41399600  | 2.14730700  |
| C | 1.36902400  | 0.21126300  | 3.54439500  |
| C | 2.91028400  | -0.02382700 | 3.49518100  |
| N | 3.58178000  | 0.61760300  | 2.49713200  |
| C | 5.03777400  | 0.63108400  | 2.44884200  |
| H | -1.36120900 | 0.12282400  | 0.02414500  |
| H | -0.76098800 | 1.76740800  | -0.19316600 |
| H | 0.35870000  | 0.38884900  | -0.34583000 |
| O | -1.13961500 | 1.42355000  | 2.41641400  |
| H | 1.36530600  | -0.21050700 | 1.48637500  |
| C | 0.68049200  | -1.02399600 | 4.24956600  |
| C | -0.52362400 | -0.56459700 | 5.09587700  |
| O | 3.49566100  | -0.70387000 | 4.33562200  |
| H | 3.06633000  | 1.27016900  | 1.92373100  |
| H | 5.46461400  | 1.30215100  | 3.20399100  |
| H | 5.41578600  | -0.37512200 | 2.63847900  |
| H | 5.35689600  | 0.95678200  | 1.45643400  |
| C | -0.06279600 | 0.32547700  | 6.27223800  |
| C | 1.14877500  | 1.21128300  | 5.89170200  |
| H | 1.43986000  | -1.39890300 | 4.94285300  |
| H | -1.23377400 | -0.01318400 | 4.47268900  |
| H | -1.05038100 | -1.44551500 | 5.47926600  |
| H | -0.90234600 | 0.95374900  | 6.59237200  |
| H | 0.20312000  | -0.30109400 | 7.13218800  |
| H | 1.11941400  | 2.15477600  | 6.44785300  |
| H | 2.08532900  | 0.71606300  | 6.17143600  |
| C | 1.15740000  | 1.51242100  | 4.38820500  |
| H | 0.20522100  | 1.95711200  | 4.09584200  |
| H | 1.94351600  | 2.23448300  | 4.13802400  |
| C | 0.38060100  | -2.16138300 | 3.28319100  |
| C | -0.86992700 | -2.30722600 | 2.66121600  |
| C | 1.37727600  | -3.10880600 | 2.99235300  |
| C | -1.11655800 | -3.36261000 | 1.77794400  |
| H | -1.66285100 | -1.59646700 | 2.87243900  |
| C | 1.13553200  | -4.16215300 | 2.10606700  |
| H | 2.34679000  | -3.02008300 | 3.47508600  |
| C | -0.11387200 | -4.29338500 | 1.49372600  |
| H | -2.09584100 | -3.45928000 | 1.31672200  |
| H | 1.92062400  | -4.88561700 | 1.90327200  |
| H | -0.30675000 | -5.11606100 | 0.81101100  |

13

E= -880.3430331 a.u.

|   |             |             |             |
|---|-------------|-------------|-------------|
| C | -0.00538400 | -0.36405900 | -0.05732300 |
| C | 0.11223600  | -0.55500900 | 1.44464600  |
| N | 1.29455100  | -0.12558600 | 2.00575800  |
| C | 1.49535400  | 0.05720700  | 3.45382500  |
| C | 1.16700100  | -1.28439000 | 4.18736000  |
| N | 1.64089200  | -2.40746000 | 3.57983300  |
| C | 1.31276500  | -3.72770400 | 4.09998400  |
| H | -0.55201600 | -1.20953500 | -0.47924500 |
| H | -0.58896500 | 0.54403200  | -0.24389000 |
| H | 0.96168100  | -0.26405900 | -0.55929800 |
| O | -0.77899700 | -1.07017400 | 2.11069300  |
| H | 1.89437100  | 0.43029400  | 1.41002500  |
| C | 0.62739300  | 1.23697100  | 4.07340900  |
| C | 1.44110200  | 2.08189000  | 5.09387600  |
| O | 0.62734900  | -1.31082800 | 5.28889500  |
| H | 1.88094400  | -2.32888600 | 2.60215300  |
| H | 1.50909700  | -3.75370700 | 5.17331200  |
| H | 0.25660500  | -3.97485200 | 3.93776000  |
| H | 1.94004800  | -4.47044200 | 3.60167100  |
| C | 2.35516000  | 1.23280900  | 5.98288400  |
| C | 3.40996400  | 0.47338200  | 5.13849800  |
| H | -0.16809800 | 0.74149100  | 4.63369200  |
| H | 2.04381900  | 2.83293900  | 4.56742200  |
| H | 0.72891800  | 2.64658400  | 5.70608000  |
| H | 2.85327000  | 1.87352300  | 6.71944000  |
| H | 1.74329700  | 0.51673600  | 6.53783600  |
| H | 4.37824000  | 0.98600500  | 5.17914600  |
| H | 3.57187300  | -0.52517100 | 5.55854100  |
| C | 3.00470100  | 0.34811900  | 3.65652700  |
| H | 3.23093800  | 1.28722600  | 3.13264500  |
| H | 3.59537400  | -0.43515300 | 3.16935000  |
| C | -0.03384400 | 2.13992300  | 3.03944900  |
| C | 0.69453700  | 3.05971600  | 2.26444900  |
| C | -1.42328500 | 2.08623200  | 2.85342600  |
| C | 0.06060300  | 3.88855000  | 1.33551900  |
| H | 1.77121300  | 3.14429700  | 2.38974200  |
| C | -2.06530400 | 2.91742000  | 1.93080000  |
| H | -2.00471800 | 1.37198000  | 3.42893800  |
| C | -1.32555000 | 3.82179200  | 1.16533200  |
| H | 0.64821100  | 4.59203500  | 0.75166400  |
| H | -3.14331100 | 2.85492000  | 1.81076500  |
| H | -1.82147500 | 4.47046900  | 0.44885800  |

14

E= -880.3364631 a.u.

|   |             |             |             |
|---|-------------|-------------|-------------|
| C | 0.63262700  | 0.29003300  | -0.01731100 |
| C | 0.59649100  | 0.91195100  | 1.37349600  |
| N | 1.22713400  | 0.17111200  | 2.33731800  |
| C | 1.32580500  | 0.35550600  | 3.80434800  |
| C | 2.80279700  | -0.11839400 | 4.06085200  |
| N | 3.73148400  | 0.79887900  | 4.41900000  |
| C | 5.13891000  | 0.44128600  | 4.54630700  |
| H | 0.96542900  | 1.05098300  | -0.72754300 |
| H | 1.27881900  | -0.58846400 | -0.09916000 |
| H | -0.38784300 | 0.00503600  | -0.29141400 |
| O | 0.03685500  | 1.99041000  | 1.55956900  |
| H | 1.59717900  | -0.72334200 | 2.04109000  |

|   |             |             |            |
|---|-------------|-------------|------------|
| C | 0.39087000  | -0.68463600 | 4.52926400 |
| C | 0.36941700  | -0.42899800 | 6.06060900 |
| O | 3.10512000  | -1.29863500 | 3.86806700 |
| H | 3.46802200  | 1.76801100  | 4.49265400 |
| H | 5.67715300  | 1.28592900  | 4.98043700 |
| H | 5.24609100  | -0.43023300 | 5.19649900 |
| H | 5.57697400  | 0.19407200  | 3.57315700 |
| C | 0.02349700  | 1.01479400  | 6.44008200 |
| C | 1.00528700  | 1.99133100  | 5.77908100 |
| H | 0.89466500  | -1.64449000 | 4.38612800 |
| H | -0.33263600 | -1.13178700 | 6.52243700 |
| H | 1.36262400  | -0.67274100 | 6.46394600 |
| H | -1.00346800 | 1.24939900  | 6.13468100 |
| H | 0.05649200  | 1.13013000  | 7.53021600 |
| H | 0.72087200  | 3.02789700  | 5.99566400 |
| H | 1.99755900  | 1.84184500  | 6.22511800 |
| C | 1.04903100  | 1.80926600  | 4.24921900 |
| H | 0.10046300  | 2.12453700  | 3.81978600 |
| H | 1.77597600  | 2.48867800  | 3.78700800 |
| C | -1.00512500 | -0.87314800 | 3.93864600 |
| C | -1.41253900 | -2.18915200 | 3.65417600 |
| C | -1.93418500 | 0.15430700  | 3.70431000 |
| C | -2.68987500 | -2.47483200 | 3.16733400 |
| H | -0.71352200 | -3.00567600 | 3.81967400 |
| C | -3.21204100 | -0.12448400 | 3.21091400 |
| H | -1.67091100 | 1.18871800  | 3.88290600 |
| C | -3.59925500 | -1.43885500 | 2.94291900 |
| H | -2.96987700 | -3.50413500 | 2.96045200 |
| H | -3.90272500 | 0.69465500  | 3.03159400 |
| H | -4.59352500 | -1.65175100 | 2.56081200 |

15

E= -880.3393302 a.u.

|   |             |             |             |
|---|-------------|-------------|-------------|
| C | -0.41798100 | -0.76606300 | 0.31496200  |
| C | -0.25025600 | -0.53748400 | 1.80710100  |
| N | 1.04205200  | -0.61569800 | 2.27054900  |
| C | 1.41469400  | -0.11577200 | 3.59754500  |
| C | 1.11534500  | 1.41697600  | 3.61693200  |
| N | 0.79291600  | 1.97968500  | 4.81702300  |
| C | 0.44368700  | 3.39268300  | 4.90596700  |
| H | -1.32897000 | -1.34386000 | 0.14612800  |
| H | -0.54102700 | 0.20832000  | -0.17016100 |
| H | 0.43291200  | -1.27884500 | -0.14240300 |
| O | -1.20971300 | -0.30456900 | 2.53793700  |
| H | 1.75484800  | -0.49917100 | 1.56037200  |
| C | 2.98208200  | -0.30987400 | 3.80238400  |
| C | 3.26648900  | -1.73956100 | 4.31410100  |
| O | 1.24898600  | 2.09456500  | 2.60168700  |
| H | 0.49191400  | 1.37689300  | 5.56649700  |
| H | 1.20086700  | 3.98870800  | 4.39323100  |
| H | -0.52605100 | 3.60105000  | 4.43880500  |
| H | 0.40842500  | 3.68155900  | 5.95873900  |
| C | 2.72639400  | -1.95080100 | 5.74493700  |
| C | 1.44821500  | -1.12077200 | 5.99477200  |
| H | 3.25413800  | 0.38350400  | 4.60736900  |
| H | 2.80658100  | -2.46361700 | 3.63172500  |
| H | 4.34455400  | -1.92762400 | 4.28507300  |
| H | 2.51761900  | -3.01623200 | 5.89765600  |
| H | 3.49414900  | -1.67759000 | 6.47880200  |
| H | 0.81212900  | -1.61489700 | 6.73756600  |
| H | 1.72187600  | -0.15156000 | 6.43158100  |

|   |             |             |             |
|---|-------------|-------------|-------------|
| C | 0.65308900  | -0.92712900 | 4.69501600  |
| H | 0.43637900  | -1.91332300 | 4.27234700  |
| H | -0.32570000 | -0.47673300 | 4.87285900  |
| C | 3.84195100  | 0.07416700  | 2.60371100  |
| C | 4.16421300  | -0.84789900 | 1.59248600  |
| C | 4.36687500  | 1.37174000  | 2.49926600  |
| C | 4.97000800  | -0.48086100 | 0.50997700  |
| H | 3.79807800  | -1.86873800 | 1.65233200  |
| C | 5.17429100  | 1.74162400  | 1.42306900  |
| H | 4.13219500  | 2.10386200  | 3.26629100  |
| C | 5.47737100  | 0.81666200  | 0.42035200  |
| H | 5.20540500  | -1.21353500 | -0.25697600 |
| H | 5.56375200  | 2.75405500  | 1.36677000  |
| H | 6.10576800  | 1.10280700  | -0.41802500 |

16

E= -880.3391094 a.u.

|   |             |             |             |
|---|-------------|-------------|-------------|
| C | -0.25675900 | 1.13615000  | 0.11541200  |
| C | -0.21918000 | 0.81616300  | 1.60330500  |
| N | 0.98498400  | 0.36876600  | 2.06999900  |
| C | 1.40943800  | 0.17784600  | 3.47939400  |
| C | 2.93505400  | -0.12923100 | 3.40918200  |
| N | 3.31559900  | -1.04728800 | 2.46603900  |
| C | 4.69887200  | -1.50641800 | 2.39706500  |
| H | -1.10329600 | 0.60973000  | -0.33267000 |
| H | -0.43650000 | 2.20907700  | -0.00386400 |
| H | 0.65743700  | 0.86881300  | -0.42217400 |
| O | -1.22210300 | 0.95038200  | 2.30308500  |
| H | 1.73412600  | 0.35202900  | 1.39264000  |
| C | 0.72208600  | -1.05202400 | 4.23765400  |
| C | -0.49716700 | -0.58242000 | 5.06509800  |
| O | 3.75117800  | 0.42322800  | 4.13911600  |
| H | 2.60216400  | -1.66369100 | 2.09662400  |
| H | 5.36692900  | -0.64361300 | 2.38524500  |
| H | 4.96778400  | -2.13055300 | 3.25799800  |
| H | 4.83315100  | -2.08111100 | 1.47832600  |
| C | -0.07910500 | 0.38276200  | 6.19698500  |
| C | 1.13173000  | 1.25809700  | 5.79879100  |
| H | 1.47961200  | -1.37334000 | 4.96503600  |
| H | -1.21207200 | -0.09433400 | 4.39897000  |
| H | -0.99448100 | -1.46331200 | 5.48582200  |
| H | -0.93668100 | 1.01733400  | 6.45015900  |
| H | 0.16399500  | -0.18437700 | 7.10432200  |
| H | 1.08108200  | 2.22753400  | 6.30705300  |
| H | 2.06961600  | 0.79511400  | 6.12123200  |
| C | 1.18362200  | 1.48712800  | 4.28322300  |
| H | 0.23636500  | 1.92066000  | 3.95239600  |
| H | 1.98498800  | 2.18640700  | 4.02989800  |
| C | 0.41744900  | -2.27288200 | 3.38210200  |
| C | -0.70583400 | -2.33340200 | 2.53844500  |
| C | 1.23510200  | -3.41286800 | 3.46818300  |
| C | -0.98429900 | -3.48366500 | 1.79661200  |
| H | -1.37245200 | -1.48026300 | 2.47057400  |
| C | 0.95966200  | -4.56626000 | 2.72632000  |
| H | 2.09222400  | -3.40266800 | 4.13785900  |
| C | -0.15174200 | -4.60368400 | 1.88203200  |
| H | -1.86080000 | -3.50661500 | 1.15475000  |
| H | 1.60644700  | -5.43439900 | 2.81910400  |
| H | -0.37418000 | -5.49795700 | 1.30700600  |

17

E= -880.3307251 a.u.

|   |             |             |             |
|---|-------------|-------------|-------------|
| C | 0.45435700  | 0.29575800  | -0.25514400 |
| C | 0.31912400  | 0.78689800  | 1.18233900  |
| N | 1.18717700  | 0.19266200  | 2.06630000  |
| C | 1.38063400  | 0.41830800  | 3.52136000  |
| C | 2.92887000  | 0.18703300  | 3.70060100  |
| N | 3.37985600  | -1.09509800 | 3.52982100  |
| C | 4.80158400  | -1.40553200 | 3.63733500  |
| H | 0.66355100  | 1.15763100  | -0.89478800 |
| H | 1.23508500  | -0.45588200 | -0.40469500 |
| H | -0.50694500 | -0.12160800 | -0.56755800 |
| O | -0.51047300 | 1.64172100  | 1.47183800  |
| H | 1.80276200  | -0.49791500 | 1.66124100  |
| C | 0.55598900  | -0.62563500 | 4.36767300  |
| C | 0.70539900  | -0.32622600 | 5.88556600  |
| O | 3.71474000  | 1.11015500  | 3.87645500  |
| H | 2.72670800  | -1.86144400 | 3.57974900  |
| H | 4.96274500  | -2.43297800 | 3.30437000  |
| H | 5.37381600  | -0.72522400 | 3.00340500  |
| H | 5.16447400  | -1.29587400 | 4.66563000  |
| C | 0.37521700  | 1.12056300  | 6.27342700  |
| C | 1.21030700  | 2.11003500  | 5.44937000  |
| H | 1.02596800  | -1.60427900 | 4.21325800  |
| H | 0.08133100  | -1.03316400 | 6.44375700  |
| H | 1.74665500  | -0.53311700 | 6.17281000  |
| H | -0.69504000 | 1.31231700  | 6.13225800  |
| H | 0.57199800  | 1.26035800  | 7.34344800  |
| H | 0.90274000  | 3.13915700  | 5.66991600  |
| H | 2.26415000  | 2.03080700  | 5.73778100  |
| C | 1.07194100  | 1.87438600  | 3.93512200  |
| H | 0.06801600  | 2.12515700  | 3.59808300  |
| H | 1.75657900  | 2.53237600  | 3.39462100  |
| C | -0.89044000 | -0.86446400 | 3.93219800  |
| C | -1.25977100 | -2.17486400 | 3.58113000  |
| C | -1.89452300 | 0.11723400  | 3.90599700  |
| C | -2.56942100 | -2.50047500 | 3.22105300  |
| H | -0.50729600 | -2.96084700 | 3.59388600  |
| C | -3.20603200 | -0.20124000 | 3.54653300  |
| H | -1.66239500 | 1.14675400  | 4.14126800  |
| C | -3.55262800 | -1.50960600 | 3.20363700  |
| H | -2.81720800 | -3.52443100 | 2.95523600  |
| H | -3.95590300 | 0.58422400  | 3.52535100  |
| H | -4.57342700 | -1.75199400 | 2.92258600  |

**Ac-t-L-c<sub>6</sub>Phe-NHMe**

1

E= -880.351682 a.u.

|   |             |             |            |
|---|-------------|-------------|------------|
| C | -0.41240200 | 0.50711100  | 0.68887100 |
| C | -0.15071800 | 0.15741800  | 2.14388200 |
| N | 1.09283100  | 0.45383500  | 2.60497800 |
| C | 1.70603100  | 0.16446200  | 3.92519600 |
| C | 1.11270700  | 1.09680900  | 5.03493900 |
| N | -0.23705400 | 1.11570100  | 5.11108600 |
| C | -0.92038000 | 1.91273500  | 6.11897400 |
| H | -1.29163500 | 1.15489900  | 0.63672100 |
| H | 0.42903000  | 0.99875100  | 0.19361000 |
| H | -0.65234300 | -0.41478700 | 0.15076200 |

|   |             |             |            |
|---|-------------|-------------|------------|
| O | -1.03946300 | -0.35961500 | 2.83435900 |
| H | 1.68040500  | 0.99627600  | 1.98437600 |
| C | 3.25646200  | 0.33193100  | 3.70562900 |
| C | 4.08267100  | -0.06192800 | 4.95181100 |
| O | 1.81822000  | 1.73194700  | 5.82362600 |
| H | -0.77784800 | 0.55368200  | 4.45425200 |
| H | -1.99628800 | 1.77349900  | 5.99795200 |
| H | -0.62750100 | 1.60650400  | 7.12853700 |
| H | -0.68021300 | 2.97531200  | 6.00927300 |
| C | 3.75784500  | -1.49150900 | 5.41117500 |
| C | 2.24894400  | -1.69997400 | 5.59840500 |
| H | 5.14472700  | 0.01354600  | 4.69021900 |
| H | 3.89206300  | 0.64770100  | 5.75948500 |
| H | 4.12677700  | -2.20735800 | 4.66145900 |
| H | 4.29137000  | -1.71290500 | 6.34329200 |
| H | 2.03712300  | -2.74783900 | 5.84218600 |
| H | 1.89630500  | -1.10535800 | 6.45093500 |
| C | 1.46241900  | -1.31662100 | 4.33557200 |
| H | 1.78502300  | -1.94420300 | 3.49395300 |
| H | 0.39539700  | -1.49801800 | 4.47221600 |
| C | 3.71065000  | 1.64613500  | 3.07315400 |
| C | 3.76153300  | 2.86452100  | 3.77388200 |
| C | 4.14406100  | 1.63892400  | 1.73491700 |
| C | 4.21956200  | 4.02679200  | 3.14967700 |
| H | 3.42800400  | 2.89594100  | 4.80413200 |
| C | 4.60028300  | 2.80299200  | 1.10730800 |
| H | 4.14465000  | 0.70250900  | 1.17984300 |
| C | 4.63749700  | 4.00483700  | 1.81528300 |
| H | 4.24978400  | 4.95619600  | 3.71179800 |
| H | 4.93223600  | 2.76461500  | 0.07344400 |
| H | 4.99329700  | 4.91277100  | 1.33666700 |
| H | 3.46982100  | -0.43823700 | 2.95005300 |

2

E= -880.3484977 a.u.

|   |             |             |             |
|---|-------------|-------------|-------------|
| C | 0.27021200  | 0.20766200  | 0.04922900  |
| C | 0.34513400  | -0.01819000 | 1.55193600  |
| N | 1.58600200  | 0.10354400  | 2.09211900  |
| C | 1.96312300  | -0.05128200 | 3.50186000  |
| C | 3.49976800  | 0.22624300  | 3.48217200  |
| N | 4.16145900  | 0.25950700  | 4.66449100  |
| C | 5.59102700  | 0.54265000  | 4.71878800  |
| H | -0.37930700 | 1.06737100  | -0.14104300 |
| H | 1.24276000  | 0.38399700  | -0.41787300 |
| H | -0.19866000 | -0.66538400 | -0.41296300 |
| O | -0.67013600 | -0.28410000 | 2.20418200  |
| H | 2.38275200  | 0.27474200  | 1.48583600  |
| C | 1.58460000  | -1.50553300 | 3.99773100  |
| C | 1.62722100  | -1.66635400 | 5.53423200  |
| O | 4.09933900  | 0.42773100  | 2.42280800  |
| H | 3.65488400  | 0.14189700  | 5.52548100  |
| H | 5.91671200  | 0.48813700  | 5.75920900  |
| H | 6.14970400  | -0.18638800 | 4.12504800  |
| H | 5.80907400  | 1.53929000  | 4.32264100  |
| C | 0.75876600  | -0.61612400 | 6.24021600  |
| C | 1.18326000  | 0.81067600  | 5.86826700  |
| H | 1.26694200  | -2.67322200 | 5.77432900  |
| H | 2.65658100  | -1.62808300 | 5.91592600  |
| H | -0.28828000 | -0.76596500 | 5.94570700  |
| H | 0.80444500  | -0.75542100 | 7.32715700  |
| H | 0.48855400  | 1.53694200  | 6.30702700  |

|   |            |             |            |
|---|------------|-------------|------------|
| H | 2.15801800 | 1.04292300  | 6.32170200 |
| C | 1.20282300 | 1.02321500  | 4.34541000 |
| H | 0.16878700 | 0.99871800  | 3.99077100 |
| H | 1.60634900 | 2.01156400  | 4.09602500 |
| C | 2.31128800 | -2.62048600 | 3.25752000 |
| C | 3.62158100 | -3.01297800 | 3.57521200 |
| C | 1.64883400 | -3.31180900 | 2.23074200 |
| C | 4.25063300 | -4.05198200 | 2.88505500 |
| H | 4.16244600 | -2.50591800 | 4.36822700 |
| C | 2.27337100 | -4.35148500 | 1.53724700 |
| H | 0.62862700 | -3.03396200 | 1.97911400 |
| C | 3.57975800 | -4.72491300 | 1.86094400 |
| H | 5.26595500 | -4.33530800 | 3.14865000 |
| H | 1.73709600 | -4.87096800 | 0.74783500 |
| H | 4.06830300 | -5.53351700 | 1.32483800 |
| H | 0.52767900 | -1.58103700 | 3.72317500 |

3

E= -880.3475663 a.u.

|   |             |             |             |
|---|-------------|-------------|-------------|
| C | 0.02044400  | -0.55996600 | 0.16784300  |
| C | 0.89411300  | -0.81675100 | 1.38440000  |
| N | 1.01325800  | 0.22084800  | 2.25555700  |
| C | 1.73964100  | 0.30323000  | 3.55700100  |
| C | 3.28640800  | 0.31449400  | 3.30936100  |
| N | 3.78994900  | -0.74622000 | 2.64033400  |
| C | 5.21675900  | -0.85675700 | 2.37714600  |
| H | -0.77634100 | -1.30889200 | 0.14943600  |
| H | -0.42688200 | 0.43743800  | 0.14283200  |
| H | 0.62568000  | -0.70369800 | -0.73167200 |
| O | 1.44881300  | -1.91352700 | 1.53389300  |
| H | 0.55402100  | 1.07648200  | 1.97765000  |
| C | 1.31020600  | -0.90938100 | 4.46716900  |
| C | -0.16253900 | -0.75442900 | 4.93712000  |
| O | 3.99084800  | 1.23680700  | 3.72195700  |
| H | 3.14750200  | -1.44452000 | 2.27230900  |
| H | 5.40224000  | -1.80254700 | 1.86449100  |
| H | 5.57102600  | -0.03119500 | 1.75025100  |
| H | 5.78379200  | -0.83520600 | 3.31280600  |
| C | -0.47585900 | 0.59870700  | 5.58508100  |
| C | -0.12283400 | 1.74581200  | 4.62977300  |
| H | -0.81703000 | -0.88636600 | 4.06485800  |
| H | -0.39230800 | -1.57560500 | 5.62490300  |
| H | -1.53829500 | 0.64315600  | 5.85351600  |
| H | 0.08457900  | 0.70691200  | 6.52185800  |
| H | -0.80697200 | 1.71527100  | 3.76893900  |
| H | -0.28787900 | 2.71675900  | 5.11164500  |
| C | 1.33921800  | 1.66825000  | 4.16277500  |
| H | 1.55723600  | 2.45177500  | 3.42623300  |
| H | 2.01432600  | 1.87786800  | 4.99239900  |
| H | 1.32931400  | -1.78245300 | 3.81311700  |
| C | 2.25672300  | -1.25893000 | 5.61677600  |
| C | 2.66131500  | -2.60078700 | 5.73518700  |
| C | 2.71028100  | -0.35938500 | 6.59552500  |
| C | 3.47551000  | -3.03230200 | 6.78366000  |
| H | 2.33363400  | -3.31916500 | 4.98759600  |
| C | 3.53051800  | -0.78427200 | 7.64485300  |
| H | 2.44321700  | 0.68859100  | 6.54874300  |
| C | 3.91545800  | -2.12189500 | 7.74740400  |
| H | 3.76922600  | -4.07672700 | 6.84249300  |
| H | 3.87099000  | -0.06114100 | 8.38065700  |
| H | 4.55321600  | -2.44913700 | 8.56349700  |



4

E= -880.3469283 a.u.

|   |             |             |             |
|---|-------------|-------------|-------------|
| C | 0.41224600  | -0.07495400 | -0.03431600 |
| C | 0.40334100  | 0.02249900  | 1.48554100  |
| N | 1.65154200  | 0.08167600  | 2.06770900  |
| C | 1.95619100  | -0.03387900 | 3.51649300  |
| C | 3.45459600  | 0.33271200  | 3.69463600  |
| N | 3.96000000  | 1.22489600  | 2.79287300  |
| C | 5.29469000  | 1.78637400  | 2.95555300  |
| H | -0.13960300 | 0.77885100  | -0.43753600 |
| H | 1.41275400  | -0.09388000 | -0.47528600 |
| H | -0.12496200 | -0.98074300 | -0.32903000 |
| O | -0.65388000 | 0.07074800  | 2.10611100  |
| H | 2.39303400  | -0.25766700 | 1.46774000  |
| C | 1.57888700  | -1.47587700 | 4.01919300  |
| C | 1.68940900  | -1.63811200 | 5.55408300  |
| O | 4.13949800  | -0.09822300 | 4.62020500  |
| H | 3.31679100  | 1.67177700  | 2.15480200  |
| H | 5.58461300  | 2.28273700  | 2.02702500  |
| H | 5.33568400  | 2.50818700  | 3.78003000  |
| H | 6.00260700  | 0.98452800  | 3.17296100  |
| C | 0.90110700  | -0.55093300 | 6.29896100  |
| C | 1.31879400  | 0.85638300  | 5.84979600  |
| H | 1.29855000  | -2.62914700 | 5.81504100  |
| H | 2.73754300  | -1.60894200 | 5.86018700  |
| H | -0.17423900 | -0.68414200 | 6.11192100  |
| H | 1.04893500  | -0.66221300 | 7.37994700  |
| H | 0.70488900  | 1.61293200  | 6.35343200  |
| H | 2.35852900  | 1.04136900  | 6.14402300  |
| C | 1.14843600  | 1.02255500  | 4.33237700  |
| H | 0.09586700  | 0.90509300  | 4.06642600  |
| H | 1.45114000  | 2.02740900  | 4.01262800  |
| C | 2.25189000  | -2.60334300 | 3.24395000  |
| C | 3.59635200  | -2.96530600 | 3.43978900  |
| C | 1.50221000  | -3.33903700 | 2.31061000  |
| C | 4.16722500  | -4.01670800 | 2.71731800  |
| H | 4.19778000  | -2.41844800 | 4.15715400  |
| C | 2.07037800  | -4.39162200 | 1.58700700  |
| H | 0.45426300  | -3.09085800 | 2.15826000  |
| C | 3.40989100  | -4.73314600 | 1.78623100  |
| H | 5.20813500  | -4.27852900 | 2.88759100  |
| H | 1.46464200  | -4.94609400 | 0.87529500  |
| H | 3.85643700  | -5.55187800 | 1.22901400  |
| H | 0.50958000  | -1.53634400 | 3.78155200  |

5

E= -880.3493295 a.u.

|   |             |             |             |
|---|-------------|-------------|-------------|
| C | 0.25431500  | 0.23729300  | 0.01218700  |
| C | 0.35751300  | -0.18790700 | 1.47060200  |
| N | 1.58980600  | -0.00728900 | 2.04315100  |
| C | 1.93021600  | -0.12296500 | 3.48453300  |
| C | 3.46205600  | 0.10316200  | 3.60022000  |
| N | 4.21863600  | -0.29545600 | 2.52975800  |
| C | 5.67456200  | -0.26091300 | 2.60439900  |
| H | -0.49743600 | 1.02835700  | -0.06624300 |
| H | 1.19473500  | 0.59529200  | -0.41654900 |
| H | -0.10404200 | -0.61356500 | -0.57341600 |
| O | -0.60880500 | -0.67406600 | 2.05508500  |
| H | 2.24255700  | 0.53697400  | 1.49600300  |

|   |             |             |            |
|---|-------------|-------------|------------|
| C | 1.54418500  | -1.55013400 | 4.05470000 |
| C | 1.69412900  | -1.58728900 | 5.59214300 |
| O | 3.96952300  | 0.62793600  | 4.58764500 |
| H | 3.80460500  | -0.97609200 | 1.90592700 |
| H | 6.08331400  | -0.38180500 | 1.59888700 |
| H | 5.98946000  | 0.70081900  | 3.01158300 |
| H | 6.06970100  | -1.05282100 | 3.25247900 |
| C | 0.81470800  | -0.52979300 | 6.27092100 |
| C | 1.18946600  | 0.87754400  | 5.79283500 |
| H | 1.41592900  | -2.59125300 | 5.93320700 |
| H | 2.73725800  | -1.42756500 | 5.88936600 |
| H | -0.24093900 | -0.73601800 | 6.04284700 |
| H | 0.92223200  | -0.59927100 | 7.36018200 |
| H | 0.49225400  | 1.61719900  | 6.20636900 |
| H | 2.18936600  | 1.13305000  | 6.15299300 |
| C | 1.15243800  | 0.97961600  | 4.26026600 |
| H | 0.11245800  | 0.90489800  | 3.92493100 |
| H | 1.53111500  | 1.95671900  | 3.93821500 |
| C | 2.23080900  | -2.71954000 | 3.35783000 |
| C | 3.48223100  | -3.21114000 | 3.76752300 |
| C | 1.59096900  | -3.36478800 | 2.28623500 |
| C | 4.07725800  | -4.29951400 | 3.12365300 |
| H | 4.00025300  | -2.74646900 | 4.60134600 |
| C | 2.18406500  | -4.45131800 | 1.63690900 |
| H | 0.61124000  | -3.01714900 | 1.97065900 |
| C | 3.43219900  | -4.92263500 | 2.05167200 |
| H | 5.04231700  | -4.66416900 | 3.46507000 |
| H | 1.66450100  | -4.93541600 | 0.81439700 |
| H | 3.89187400  | -5.77156000 | 1.55362000 |
| H | 0.47657500  | -1.63671500 | 3.83525100 |

6

E= -880.3451983 a.u.

|   |             |             |             |
|---|-------------|-------------|-------------|
| C | -0.20763400 | -0.30873200 | 0.30267400  |
| C | -0.18754200 | -0.44466000 | 1.81838500  |
| N | 1.05721100  | -0.48060000 | 2.37748700  |
| C | 1.59192800  | -0.38034900 | 3.77116000  |
| C | 0.96191900  | -1.36244000 | 4.80409300  |
| N | -0.20678400 | -1.96677700 | 4.50960600  |
| C | -0.83323500 | -2.84677200 | 5.48550500  |
| H | -0.71200900 | 0.62934000  | 0.05207200  |
| H | 0.78136100  | -0.31415400 | -0.16374900 |
| H | -0.80665400 | -1.12328500 | -0.11243200 |
| O | -1.25141200 | -0.53651700 | 2.43713000  |
| H | 1.79945200  | -0.42575400 | 1.69472300  |
| C | 1.51646000  | 1.12127000  | 4.25779200  |
| C | 2.43521100  | 1.39400500  | 5.47364500  |
| O | 1.56120900  | -1.57416400 | 5.86501600  |
| H | -0.78803800 | -1.55505100 | 3.77427700  |
| H | -1.70455600 | -3.31262200 | 5.02088500  |
| H | -0.13045600 | -3.62218300 | 5.79974000  |
| H | -1.15144300 | -2.30020000 | 6.38182600  |
| C | 3.89728200  | 1.03980700  | 5.17943300  |
| C | 4.03555300  | -0.42832800 | 4.76227900  |
| H | 2.34465700  | 2.45679700  | 5.72685600  |
| H | 2.08777100  | 0.82316400  | 6.33986600  |
| H | 4.27531500  | 1.69289500  | 4.37763300  |
| H | 4.51565900  | 1.24017300  | 6.06245600  |
| H | 5.06516000  | -0.63994800 | 4.44637400  |
| H | 3.80792700  | -1.07701000 | 5.61006000  |
| C | 3.09897000  | -0.76672700 | 3.59540200  |

|   |             |             |            |
|---|-------------|-------------|------------|
| H | 3.46102900  | -0.21646300 | 2.71256800 |
| H | 3.15732000  | -1.83398500 | 3.35160600 |
| C | 0.11527500  | 1.67074400  | 4.48185900 |
| C | -0.65866300 | 1.30369200  | 5.59478100 |
| C | -0.41192100 | 2.62125100  | 3.59632000 |
| C | -1.92486300 | 1.85511100  | 5.79895300 |
| H | -0.27201400 | 0.58572400  | 6.31190500 |
| C | -1.67743500 | 3.17779400  | 3.79736500 |
| H | 0.17863300  | 2.93388200  | 2.73770200 |
| C | -2.44169600 | 2.79244100  | 4.90012800 |
| H | -2.50756900 | 1.55417100  | 6.66526700 |
| H | -2.06317200 | 3.91100500  | 3.09441400 |
| H | -3.42672900 | 3.22076000  | 5.06154300 |
| H | 1.94150500  | 1.68313300  | 3.41354900 |

7

E= -880.3449982 a.u.

|   |             |             |             |
|---|-------------|-------------|-------------|
| C | -0.00965500 | -0.29262700 | -0.04097000 |
| C | 0.65838100  | 0.39896300  | 1.13594300  |
| N | 0.67498700  | -0.31494300 | 2.30657300  |
| C | 1.50583600  | 0.05729200  | 3.47041900  |
| C | 2.98484300  | 0.03865300  | 2.97781400  |
| N | 3.76899800  | 1.10208100  | 3.27372300  |
| C | 5.14574400  | 1.17712900  | 2.80446200  |
| H | 0.76966500  | -0.61505000 | -0.73940400 |
| H | -0.60763300 | -1.16265900 | 0.24519400  |
| H | -0.64415000 | 0.42965800  | -0.55936600 |
| O | 1.14130800  | 1.52471300  | 1.03125500  |
| H | 0.48230600  | -1.30285800 | 2.21195300  |
| C | 1.33482300  | -1.10377100 | 4.52200700  |
| C | -0.11823400 | -1.13860900 | 5.07460300  |
| O | 3.40823600  | -0.94974200 | 2.37716900  |
| H | 3.32955900  | 1.94890700  | 3.59861900  |
| H | 5.65483900  | 1.98631600  | 3.33229800  |
| H | 5.65188300  | 0.23328700  | 3.01537600  |
| H | 5.19445400  | 1.36003100  | 1.72458700  |
| C | -0.67607000 | 0.21211100  | 5.55527600  |
| C | -0.45087200 | 1.32662300  | 4.52328400  |
| H | -0.77465700 | -1.51244200 | 4.27849600  |
| H | -0.16430400 | -1.87826700 | 5.88191400  |
| H | -1.74792300 | 0.10219500  | 5.76081400  |
| H | -0.21740100 | 0.49413800  | 6.50968500  |
| H | -1.09219200 | 1.15813100  | 3.65034700  |
| H | -0.74397000 | 2.29559700  | 4.94436700  |
| C | 1.01384300  | 1.39924000  | 4.06109000  |
| H | 1.12404400  | 2.18442600  | 3.30907800  |
| H | 1.64806500  | 1.65426200  | 4.91840900  |
| H | 1.47799300  | -2.02470600 | 3.94489500  |
| C | 2.42516300  | -1.15656800 | 5.59401600  |
| C | 3.40873400  | -2.15567100 | 5.48680600  |
| C | 2.50079500  | -0.29143300 | 6.69922000  |
| C | 4.42348100  | -2.28865100 | 6.43642100  |
| H | 3.38605500  | -2.82843100 | 4.63454900  |
| C | 3.51458300  | -0.42018300 | 7.65318200  |
| H | 1.76833600  | 0.49418100  | 6.83545600  |
| C | 4.48172700  | -1.41899100 | 7.52752200  |
| H | 5.16768700  | -3.07160600 | 6.32051900  |
| H | 3.54316000  | 0.26358700  | 8.49716300  |
| H | 5.26793100  | -1.51891800 | 8.27033900  |

8

E= -880.346228 a.u.

|   |             |             |             |
|---|-------------|-------------|-------------|
| C | -0.44789800 | -0.01917800 | 0.29059400  |
| C | -0.25861300 | -0.40581300 | 1.74958300  |
| N | 1.04570900  | -0.38111300 | 2.19818500  |
| C | 1.48845800  | -0.39569800 | 3.60801100  |
| C | 0.75320200  | -1.51288200 | 4.40185100  |
| N | 0.63177900  | -2.70505500 | 3.75307900  |
| C | -0.14267500 | -3.78932800 | 4.34246300  |
| H | -0.84410200 | 1.00113000  | 0.25563300  |
| H | 0.47354700  | -0.05698400 | -0.29838200 |
| H | -1.19330700 | -0.68077800 | -0.15530500 |
| O | -1.20074600 | -0.74183200 | 2.45556600  |
| H | 1.73117100  | -0.01951900 | 1.54761500  |
| C | 1.37916300  | 1.05060300  | 4.22113300  |
| C | 2.07636900  | 1.17620600  | 5.59881700  |
| O | 0.43948000  | -1.37820400 | 5.58209900  |
| H | 0.69765100  | -2.68039900 | 2.74581700  |
| H | 0.05395900  | -4.70786500 | 3.78469300  |
| H | 0.16153900  | -3.92718300 | 5.38111400  |
| H | -1.21783300 | -3.57345400 | 4.32142300  |
| C | 3.54060400  | 0.71907900  | 5.54806100  |
| C | 3.67109000  | -0.69151200 | 4.95939600  |
| H | 2.02437200  | 2.22719700  | 5.90633300  |
| H | 1.52784200  | 0.59094500  | 6.33979100  |
| H | 4.12288300  | 1.42062800  | 4.93151300  |
| H | 3.97742900  | 0.75090200  | 6.55326600  |
| H | 4.72698700  | -0.97015600 | 4.85858900  |
| H | 3.21542100  | -1.42119400 | 5.63938900  |
| C | 3.00053900  | -0.77860900 | 3.58193900  |
| H | 3.50719200  | -0.07985400 | 2.89828200  |
| H | 3.10938500  | -1.78175300 | 3.15719400  |
| C | 0.00451800  | 1.70809100  | 4.21133900  |
| C | -1.01309400 | 1.35855400  | 5.11403000  |
| C | -0.24234700 | 2.75714200  | 3.31228800  |
| C | -2.23610100 | 2.03055800  | 5.10297300  |
| H | -0.85110800 | 0.54327800  | 5.80919600  |
| C | -1.46709400 | 3.43175200  | 3.29750200  |
| H | 0.53999400  | 3.06089300  | 2.61921100  |
| C | -2.47154900 | 3.06770100  | 4.19543700  |
| H | -3.01160100 | 1.73808600  | 5.80559000  |
| H | -1.63009100 | 4.24225700  | 2.59207600  |
| H | -3.42543000 | 3.58766700  | 4.19199200  |
| H | 1.98949700  | 1.64430800  | 3.52291900  |

9

E= -880.3417086 a.u.

|   |             |             |             |
|---|-------------|-------------|-------------|
| C | 0.32783200  | -0.24147000 | -0.06526500 |
| C | 0.20590600  | -0.19728900 | 1.44949900  |
| N | 1.37710500  | -0.03165700 | 2.12994100  |
| C | 1.53919200  | 0.13482200  | 3.60213200  |
| C | 0.94291300  | 1.54262700  | 3.93258900  |
| N | -0.38402900 | 1.58230200  | 4.22672800  |
| C | -1.06002800 | 2.86363400  | 4.38664600  |
| H | -0.24934500 | 0.58725400  | -0.48568500 |
| H | 1.35702300  | -0.18107500 | -0.42967900 |
| H | -0.12409100 | -1.17075100 | -0.42245700 |
| O | -0.89414700 | -0.31549400 | 1.99693500  |
| H | 2.18919200  | 0.19392800  | 1.57261700  |
| C | 3.08817100  | 0.15920200  | 3.85727600  |
| C | 3.71645700  | -1.23198000 | 3.55865100  |
| O | 1.64482600  | 2.55116100  | 3.88651500  |

|   |             |             |            |
|---|-------------|-------------|------------|
| H | -0.93972900 | 0.80008200  | 3.89983200 |
| H | -2.05708500 | 2.68548000  | 4.79502200 |
| H | -0.49251900 | 3.48908700  | 5.07792100 |
| H | -1.14966800 | 3.40306400  | 3.43531600 |
| C | 3.03878000  | -2.39263900 | 4.29820200 |
| C | 1.52616600  | -2.40076600 | 4.03949900 |
| H | 3.65564500  | -1.42652300 | 2.47916900 |
| H | 4.78314800  | -1.18790500 | 3.80429600 |
| H | 3.48126200  | -3.34155500 | 3.97143800 |
| H | 3.23736400  | -2.31814000 | 5.37374100 |
| H | 1.33831500  | -2.66372100 | 2.99050700 |
| H | 1.03907800  | -3.17614400 | 4.64263800 |
| C | 0.86289100  | -1.04634600 | 4.34280200 |
| H | -0.19030700 | -1.10614100 | 4.06816000 |
| H | 0.89572900  | -0.83506200 | 5.41459600 |
| H | 3.48621200  | 0.86185500  | 3.11640400 |
| C | 3.56053200  | 0.72417800  | 5.19987500 |
| C | 4.48662800  | 1.78137800  | 5.16939800 |
| C | 3.19702100  | 0.22538500  | 6.46145600 |
| C | 5.02803800  | 2.31811000  | 6.33672100 |
| H | 4.76950700  | 2.20627700  | 4.21051400 |
| C | 3.73009900  | 0.76498400  | 7.63739900 |
| H | 2.49225200  | -0.59059400 | 6.55373200 |
| C | 4.64986400  | 1.81174900  | 7.58307400 |
| H | 5.73592300  | 3.13972300  | 6.27202900 |
| H | 3.42224700  | 0.35796800  | 8.59668700 |
| H | 5.06348900  | 2.22927100  | 8.49651700 |

10

E= -880.3421203 a.u.

|   |             |             |             |
|---|-------------|-------------|-------------|
| C | -0.06774000 | -0.07359100 | 0.32247600  |
| C | 0.16030300  | -0.04751800 | 1.82477000  |
| N | 1.45928600  | 0.13366200  | 2.22105400  |
| C | 1.94165300  | -0.07641200 | 3.60722700  |
| C | 1.59124200  | -1.56699200 | 3.94639600  |
| N | 0.83766500  | -1.85299300 | 5.02897200  |
| C | 0.42257000  | -3.21940100 | 5.31371500  |
| H | -0.94887100 | 0.52867700  | 0.09010400  |
| H | 0.78536300  | 0.29148600  | -0.25653100 |
| H | -0.27977500 | -1.10543000 | 0.02347000  |
| O | -0.77086800 | -0.17617000 | 2.61845500  |
| H | 2.15644400  | 0.00715500  | 1.50042300  |
| C | 1.32431100  | 1.06672900  | 4.49763700  |
| C | 1.90271600  | 2.44427600  | 4.05748700  |
| O | 2.03433700  | -2.44942300 | 3.20728200  |
| H | 0.40722200  | -1.10201900 | 5.54607700  |
| H | -0.03560700 | -3.24579400 | 6.30439300  |
| H | -0.29800200 | -3.57979600 | 4.57064900  |
| H | 1.28967700  | -3.88362000 | 5.29683600  |
| C | 3.43510100  | 2.50395800  | 4.05712000  |
| C | 4.02470800  | 1.39926100  | 3.16960200  |
| H | 1.53743200  | 2.65828100  | 3.04606900  |
| H | 1.48920700  | 3.21791200  | 4.71381900  |
| H | 3.76541600  | 3.48766400  | 3.70210200  |
| H | 3.81559600  | 2.40436800  | 5.08122900  |
| H | 3.78771000  | 1.62103900  | 2.12005200  |
| H | 5.11915000  | 1.38985700  | 3.23834900  |
| C | 3.49027000  | 0.00733800  | 3.54482400  |
| H | 3.83708600  | -0.75363900 | 2.83785400  |
| H | 3.89029000  | -0.29444600 | 4.51728600  |
| H | 0.26382700  | 1.08016300  | 4.23791900  |

|   |             |            |            |
|---|-------------|------------|------------|
| C | 1.36474500  | 0.92874500 | 6.02171100 |
| C | 0.16340900  | 1.16273300 | 6.71849100 |
| C | 2.50887900  | 0.65051500 | 6.79062300 |
| C | 0.10057700  | 1.11876300 | 8.11377400 |
| H | -0.73897300 | 1.38412300 | 6.15322800 |
| C | 2.45094000  | 0.60209900 | 8.18599600 |
| H | 3.46081600  | 0.45891800 | 6.31188900 |
| C | 1.24824100  | 0.83556000 | 8.85660000 |
| H | -0.84502000 | 1.30447600 | 8.61544300 |
| H | 3.35305900  | 0.37933700 | 8.74903600 |
| H | 1.20722500  | 0.79693700 | 9.94116400 |

11

E= -880.3425103 a.u.

|   |             |             |             |
|---|-------------|-------------|-------------|
| C | 0.31108700  | -0.24806400 | -0.00682600 |
| C | 0.24097400  | 0.06807500  | 1.48030300  |
| N | 1.44420100  | 0.06464500  | 2.14431500  |
| C | 1.59570000  | 0.13545100  | 3.61928500  |
| C | 0.99768700  | 1.46982600  | 4.15295600  |
| N | 1.19349300  | 2.56226400  | 3.36425700  |
| C | 0.62242900  | 3.85353400  | 3.71902800  |
| H | -0.26242900 | 0.50522500  | -0.55241800 |
| H | 1.32951200  | -0.28543100 | -0.40488300 |
| H | -0.17032800 | -1.21571200 | -0.18049100 |
| O | -0.82205300 | 0.32586800  | 2.03460100  |
| H | 2.24524600  | -0.26009300 | 1.62163000  |
| C | 3.15516600  | 0.12500700  | 3.87301800  |
| C | 3.75509900  | -1.28851000 | 3.60852800  |
| O | 0.46892500  | 1.53448000  | 5.25723800  |
| H | 1.44701400  | 2.39617900  | 2.40162100  |
| H | 1.09592200  | 4.63005600  | 3.11362300  |
| H | -0.46206200 | 3.87682200  | 3.55640200  |
| H | 0.81409700  | 4.05282800  | 4.77478500  |
| C | 3.01480700  | -2.42975100 | 4.31750400  |
| C | 1.51913900  | -2.40879300 | 3.97300600  |
| H | 3.74221400  | -1.49045000 | 2.52668200  |
| H | 4.81213400  | -1.27124400 | 3.89558700  |
| H | 3.46211900  | -3.38798100 | 4.02640200  |
| H | 3.14858700  | -2.34503900 | 5.40258700  |
| H | 1.38882700  | -2.64047000 | 2.90613200  |
| H | 0.99032400  | -3.19669200 | 4.52189200  |
| C | 0.87540800  | -1.05397700 | 4.29524600  |
| H | -0.17256200 | -1.03602600 | 3.98614700  |
| H | 0.87148800  | -0.87494100 | 5.37214700  |
| H | 3.56846100  | 0.79038000  | 3.10466800  |
| C | 3.64553000  | 0.71698900  | 5.19385300  |
| C | 4.60729400  | 1.73956300  | 5.13342000  |
| C | 3.24994100  | 0.27235800  | 6.46580600  |
| C | 5.15920200  | 2.29648900  | 6.28913100  |
| H | 4.92856700  | 2.10948100  | 4.16245800  |
| C | 3.79597100  | 0.82759500  | 7.62507600  |
| H | 2.49498400  | -0.49593100 | 6.56925900  |
| C | 4.75463100  | 1.83984400  | 7.54471700  |
| H | 5.89923900  | 3.08753400  | 6.20554500  |
| H | 3.46183700  | 0.46987300  | 8.59478800  |
| H | 5.17559000  | 2.27045400  | 8.44863500  |

12

E= -880.3393909 a.u.

|   |             |             |            |
|---|-------------|-------------|------------|
| C | -0.03028700 | -0.12864900 | 0.11883600 |
|---|-------------|-------------|------------|

|   |             |             |             |
|---|-------------|-------------|-------------|
| C | 0.19046900  | -0.18531300 | 1.62081800  |
| N | 1.47668100  | -0.03223500 | 2.03587700  |
| C | 2.02813500  | 0.01282600  | 3.42101500  |
| C | 1.98746600  | -1.41951700 | 4.05488000  |
| N | 0.79061800  | -2.04226100 | 4.05702500  |
| C | 0.62007200  | -3.33992700 | 4.69207800  |
| H | -0.50911900 | -1.05933900 | -0.19812600 |
| H | -0.72459000 | 0.68794600  | -0.09907400 |
| H | 0.88561500  | 0.01881200  | -0.45982700 |
| O | -0.76317500 | -0.35554400 | 2.39091800  |
| H | 2.17225200  | 0.02719700  | 1.30539400  |
| C | 1.22507500  | 1.09657700  | 4.27196900  |
| C | 2.01766700  | 2.42841700  | 4.31834200  |
| O | 3.00663100  | -1.93369900 | 4.52230200  |
| H | -0.01914100 | -1.54503700 | 3.69233400  |
| H | 1.35136300  | -4.05534100 | 4.30544100  |
| H | 0.75505300  | -3.27073700 | 5.77749100  |
| H | -0.38766100 | -3.70114100 | 4.47826400  |
| C | 3.41678100  | 2.31403100  | 4.94883200  |
| C | 4.16275400  | 1.03967100  | 4.47612900  |
| H | 2.11019700  | 2.79845300  | 3.28879800  |
| H | 1.41966200  | 3.17256600  | 4.85580600  |
| H | 3.98939700  | 3.21145800  | 4.68612100  |
| H | 3.33282100  | 2.31563400  | 6.04052400  |
| H | 5.20865000  | 1.27140400  | 4.24640100  |
| H | 4.19016900  | 0.27958600  | 5.26073800  |
| C | 3.51516900  | 0.42464000  | 3.23125900  |
| H | 3.55646200  | 1.16273100  | 2.41931300  |
| H | 4.08313100  | -0.45484300 | 2.91597700  |
| H | 0.32053300  | 1.29810000  | 3.69799900  |
| C | 0.72172200  | 0.68904800  | 5.65703100  |
| C | -0.63894300 | 0.89138200  | 5.94466000  |
| C | 1.53706100  | 0.18575300  | 6.68406600  |
| C | -1.16828800 | 0.61224600  | 7.20651500  |
| H | -1.29554500 | 1.26216000  | 5.16164800  |
| C | 1.01079200  | -0.10056000 | 7.94680600  |
| H | 2.58603800  | -0.01451500 | 6.50354800  |
| C | -0.34243000 | 0.11450200  | 8.21712400  |
| H | -2.22538800 | 0.77806600  | 7.39532900  |
| H | 1.66486600  | -0.49558700 | 8.71929200  |
| H | -0.74824100 | -0.10769000 | 9.19995400  |

13

E= -880.3393561 a.u.

|   |             |             |             |
|---|-------------|-------------|-------------|
| C | -0.43357900 | 0.19182500  | 0.24081200  |
| C | -0.18280400 | 0.12256800  | 1.73754700  |
| N | 1.12156000  | 0.05132500  | 2.11647000  |
| C | 1.71300800  | 0.02635800  | 3.48572300  |
| C | 1.43437800  | -1.35938900 | 4.16117200  |
| N | 0.14596200  | -1.75676500 | 4.20966400  |
| C | -0.23645300 | -2.98410300 | 4.89052200  |
| H | -1.07824700 | -0.64459700 | -0.04323700 |
| H | -0.97906200 | 1.11458200  | 0.02310900  |
| H | 0.47673100  | 0.16501100  | -0.36421300 |
| O | -1.12932800 | 0.13809500  | 2.53468300  |
| H | 1.79597800  | -0.02065300 | 1.36751200  |
| C | 1.14281800  | 1.25538300  | 4.32702400  |
| C | 2.15618100  | 2.42750800  | 4.30424300  |
| O | 2.35789100  | -2.03588100 | 4.62056200  |
| H | -0.57161100 | -1.13139500 | 3.84911400  |
| H | 0.35011600  | -3.82821200 | 4.51725100  |

|   |             |             |            |
|---|-------------|-------------|------------|
| H | -0.06920800 | -2.90659400 | 5.97091400 |
| H | -1.29610300 | -3.16883100 | 4.70397600 |
| C | 3.53477900  | 2.08690800  | 4.89885900 |
| C | 4.02703300  | 0.68608000  | 4.45521000 |
| H | 2.27703200  | 2.74476600  | 3.26012900 |
| H | 1.71639100  | 3.28100900  | 4.83192500 |
| H | 4.24730100  | 2.85912600  | 4.58527500 |
| H | 3.49106400  | 2.13975100  | 5.99170300 |
| H | 5.09020300  | 0.71932100  | 4.19249400 |
| H | 3.94262700  | -0.04208500 | 5.26574000 |
| C | 3.24409100  | 0.15853900  | 3.24789900 |
| H | 3.39395700  | 0.85171700  | 2.40944400 |
| H | 3.63652400  | -0.81783100 | 2.95119000 |
| H | 0.26625300  | 1.59594400  | 3.77602900 |
| C | 0.62584900  | 0.97866300  | 5.73921600 |
| C | -0.66522900 | 1.43055300  | 6.06206400 |
| C | 1.37231100  | 0.36058600  | 6.75588200 |
| C | -1.19185000 | 1.28159200  | 7.34693400 |
| H | -1.27162500 | 1.89589900  | 5.28904600 |
| C | 0.84769500  | 0.20440100  | 8.04195600 |
| H | 2.36127000  | -0.02997400 | 6.55034600 |
| C | -0.43448300 | 0.66652200  | 8.34649300 |
| H | -2.19487300 | 1.63956800  | 7.56225500 |
| H | 1.44686600  | -0.28402600 | 8.80552600 |
| H | -0.83930400 | 0.54380700  | 9.34702200 |

14

E= -880.335818 a.u.

|   |             |             |             |
|---|-------------|-------------|-------------|
| C | 0.09460800  | -0.50750000 | 0.11967200  |
| C | 0.04093700  | -0.20811300 | 1.61476300  |
| N | 1.26454600  | -0.02322100 | 2.18638100  |
| C | 1.71299600  | 0.21185700  | 3.57522900  |
| C | 3.27925200  | 0.21477400  | 3.38941500  |
| N | 4.04210600  | 0.72384800  | 4.38331200  |
| C | 5.49717100  | 0.65340300  | 4.31337600  |
| H | -0.46102000 | 0.27324900  | -0.40786900 |
| H | 1.10619600  | -0.56464700 | -0.29098300 |
| H | -0.42191000 | -1.45434300 | -0.06169900 |
| O | -1.04636300 | -0.14170100 | 2.18918600  |
| H | 2.07026100  | -0.20559800 | 1.59205900  |
| C | 1.25456100  | -0.98881000 | 4.52776200  |
| C | -0.19548700 | -0.80160200 | 5.06772400  |
| O | 3.79408700  | -0.19987700 | 2.34498700  |
| H | 3.62680300  | 0.85772700  | 5.29280700  |
| H | 5.91321200  | 1.24679200  | 5.12967500  |
| H | 5.85443100  | -0.37938600 | 4.39581200  |
| H | 5.83790600  | 1.05982100  | 3.35939400  |
| C | -0.56880400 | 0.61005500  | 5.55482300  |
| C | -0.21675800 | 1.68749500  | 4.52240300  |
| H | -0.88098800 | -1.05795700 | 4.25860400  |
| H | -0.34979400 | -1.52812900 | 5.87419600  |
| H | -1.64552900 | 0.63065300  | 5.76104900  |
| H | -0.07748400 | 0.84539500  | 6.50817700  |
| H | -0.85652500 | 1.57441300  | 3.64565200  |
| H | -0.39887500 | 2.68482200  | 4.94256200  |
| C | 1.26012500  | 1.59589400  | 4.11664200  |
| H | 1.50575700  | 2.35033700  | 3.36083000  |
| H | 1.86307800  | 1.83945700  | 5.00001500  |
| H | 1.22727100  | -1.85099800 | 3.85451100  |
| C | 2.25356000  | -1.37467100 | 5.61897200  |
| C | 3.14524000  | -2.43338000 | 5.37500500  |



|   |            |             |            |
|---|------------|-------------|------------|
| C | 2.32078400 | -0.74768300 | 6.87597400 |
| C | 4.07504900 | -2.84247200 | 6.33360300 |
| H | 3.11015900 | -2.94489500 | 4.41644300 |
| C | 3.25114200 | -1.15176500 | 7.83918300 |
| H | 1.63684000 | 0.05693800  | 7.12007100 |
| C | 4.13597600 | -2.19906700 | 7.57228700 |
| H | 4.74664100 | -3.66756400 | 6.11317400 |
| H | 3.27530300 | -0.65058000 | 8.80307300 |
| H | 4.85450700 | -2.51595400 | 8.32248800 |

15

E= -880.3347844 a.u.

|   |             |             |             |
|---|-------------|-------------|-------------|
| C | 0.18907000  | -0.52876900 | 0.09422300  |
| C | 0.11600300  | -0.23873500 | 1.58722000  |
| N | 1.32088600  | -0.07107200 | 2.19658300  |
| C | 1.61055000  | 0.22006600  | 3.60955200  |
| C | 3.15030700  | 0.48745500  | 3.58002100  |
| N | 3.68590800  | 1.18490300  | 4.60658600  |
| C | 5.12680300  | 1.37438300  | 4.72261900  |
| H | -0.33959500 | -1.46533600 | -0.10451500 |
| H | -0.34068200 | 0.26551500  | -0.43982600 |
| H | 1.20868100  | -0.60104700 | -0.29386900 |
| O | -0.97422700 | -0.15992000 | 2.15953600  |
| H | 2.16826700  | -0.21298300 | 1.65402800  |
| C | 1.27674900  | -1.06854100 | 4.51813400  |
| C | -0.14509700 | -0.96864700 | 5.12703100  |
| O | 3.84430100  | 0.09228100  | 2.63747500  |
| H | 3.11549700  | 1.37190400  | 5.41663300  |
| H | 5.63426600  | 0.43719000  | 4.97691400  |
| H | 5.52657000  | 1.73679900  | 3.77368700  |
| H | 5.32003600  | 2.11360200  | 5.50239400  |
| C | -0.47387600 | 0.33028000  | 5.91030200  |
| C | 0.46806100  | 1.49472100  | 5.56050900  |
| H | -0.84231500 | -1.04252100 | 4.29093300  |
| H | -0.30790700 | -1.84633800 | 5.76237000  |
| H | -1.50079400 | 0.62404000  | 5.66424800  |
| H | -0.46243400 | 0.15850100  | 6.99293900  |
| H | -0.00319300 | 2.45104400  | 5.81408700  |
| H | 1.37018200  | 1.43762500  | 6.18580200  |
| C | 0.82044700  | 1.48564100  | 4.06756900  |
| H | -0.11587700 | 1.50531700  | 3.50573300  |
| H | 1.38551800  | 2.38074200  | 3.78753700  |
| H | 1.23593800  | -1.88014100 | 3.78575500  |
| C | 2.36325200  | -1.49551800 | 5.50891100  |
| C | 3.44537400  | -2.26107300 | 5.03835600  |
| C | 2.32002400  | -1.21250600 | 6.88363500  |
| C | 4.45373000  | -2.70437400 | 5.89571400  |
| H | 3.50024900  | -2.50981900 | 3.98210000  |
| C | 3.32662200  | -1.65537900 | 7.74826500  |
| H | 1.48895800  | -0.65557800 | 7.30047600  |
| C | 4.40164000  | -2.39944600 | 7.25872600  |
| H | 5.27464100  | -3.29515100 | 5.49880100  |
| H | 3.26143100  | -1.42420400 | 8.80808000  |
| H | 5.18082500  | -2.74737900 | 7.93072100  |

16

E= -880.3310409 a.u.

|   |            |             |            |
|---|------------|-------------|------------|
| C | 0.26575800 | -0.58676600 | 0.15023800 |
| C | 0.13318400 | -0.39856000 | 1.65240400 |
| N | 1.27263000 | -0.02617300 | 2.30228400 |

|   |             |             |             |
|---|-------------|-------------|-------------|
| C | 1.42391000  | 0.29176900  | 3.75419200  |
| C | 0.64517300  | 1.63400900  | 3.96762900  |
| N | -0.68900600 | 1.51443200  | 4.20325000  |
| C | -1.53351900 | 2.70162900  | 4.24832600  |
| H | -0.04518100 | -1.60481500 | -0.10011300 |
| H | -0.42369100 | 0.09957600  | -0.34972500 |
| H | 1.27690100  | -0.41854000 | -0.23048400 |
| O | -0.94783900 | -0.59248800 | 2.21852000  |
| H | 2.05509700  | 0.22984400  | 1.71699200  |
| C | 2.94920400  | 0.54234900  | 3.95075800  |
| C | 3.76957000  | -0.74732100 | 3.58958000  |
| O | 1.21717700  | 2.71921300  | 3.89189100  |
| H | -1.11849400 | 0.64430000  | 3.90176300  |
| H | -1.08539500 | 3.44145100  | 4.91398100  |
| H | -1.64983400 | 3.16200500  | 3.25897100  |
| H | -2.51658900 | 2.41867600  | 4.63065600  |
| C | 3.04419300  | -2.07874500 | 3.89380800  |
| C | 2.02089600  | -1.90304700 | 5.01815500  |
| H | 4.05361200  | -0.72161600 | 2.53051900  |
| H | 4.70923800  | -0.70778500 | 4.14728500  |
| H | 2.52939300  | -2.44198800 | 2.99583600  |
| H | 3.78011500  | -2.84525000 | 4.16129000  |
| H | 1.55852500  | -2.86392400 | 5.27180300  |
| H | 2.53534100  | -1.55601400 | 5.92173800  |
| C | 0.91277900  | -0.90884800 | 4.61605700  |
| H | 0.14228700  | -1.43310400 | 4.04875300  |
| H | 0.41404300  | -0.52891200 | 5.51109000  |
| H | 3.21220800  | 1.31972900  | 3.22399700  |
| C | 3.38652100  | 1.13357500  | 5.29702500  |
| C | 4.68115000  | 1.67913100  | 5.35716100  |
| C | 2.61386900  | 1.18179500  | 6.46438700  |
| C | 5.19135000  | 2.23122300  | 6.53160200  |
| H | 5.29937700  | 1.68133900  | 4.46218000  |
| C | 3.11818000  | 1.73438300  | 7.64641700  |
| H | 1.59907400  | 0.80411600  | 6.47255800  |
| C | 4.40984100  | 2.25813400  | 7.69005300  |
| H | 6.19493600  | 2.64745600  | 6.53857300  |
| H | 2.48992000  | 1.75775900  | 8.53255900  |
| H | 4.79931400  | 2.68871500  | 8.60791000  |

17

E= -880.4036155 a.u.

|   |             |             |             |
|---|-------------|-------------|-------------|
| C | 0.38840600  | -0.68556300 | -0.03251800 |
| C | 0.28254300  | -0.59716900 | 1.48372900  |
| N | 1.38368500  | -0.08498200 | 2.11688100  |
| C | 1.49302900  | 0.25829100  | 3.56201000  |
| C | 2.95532300  | 0.77780900  | 3.72197000  |
| N | 3.92560200  | 0.00292400  | 3.14882400  |
| C | 5.33711700  | 0.30195700  | 3.36400300  |
| H | 0.15766100  | -1.70941000 | -0.33829300 |
| H | -0.37165400 | -0.03280200 | -0.47244600 |
| H | 1.36882600  | -0.40495100 | -0.42812700 |
| O | -0.72581200 | -0.97863900 | 2.07351700  |
| H | 2.10764300  | 0.28964500  | 1.51981000  |
| C | 1.21277600  | -1.04507800 | 4.44988600  |
| C | -0.11864500 | -0.90920400 | 5.23547500  |
| O | 3.21963100  | 1.83953600  | 4.27643600  |
| H | 3.68370700  | -0.95296300 | 2.92523100  |
| H | 5.51224600  | 1.36273400  | 3.17809100  |
| H | 5.64620300  | 0.07657000  | 4.39153800  |
| H | 5.93368400  | -0.29074000 | 2.66722700  |

|   |             |             |            |
|---|-------------|-------------|------------|
| C | -0.22327200 | 0.34090200  | 6.12554500 |
| C | 0.30464500  | 1.61304200  | 5.41202500 |
| H | -0.91982400 | -0.89839800 | 4.49215900 |
| H | -0.25664000 | -1.81459000 | 5.83759100 |
| H | -1.27613700 | 0.46915300  | 6.40300100 |
| H | 0.31766600  | 0.18568700  | 7.06560900 |
| H | -0.39176300 | 2.44673900  | 5.55579900 |
| H | 1.25562800  | 1.93719900  | 5.84366600 |
| C | 0.50196800  | 1.39982000  | 3.90296600 |
| H | -0.45584300 | 1.14890100  | 3.43853900 |
| H | 0.86577400  | 2.32255500  | 3.44199500 |
| H | 1.04227300  | -1.84448100 | 3.72529500 |
| C | 2.34755100  | -1.53720900 | 5.34628200 |
| C | 2.78476100  | -2.86545100 | 5.20387100 |
| C | 2.94024700  | -0.76165400 | 6.35809500 |
| C | 3.77388100  | -3.40361500 | 6.03213500 |
| H | 2.33432800  | -3.49227500 | 4.43715400 |
| C | 3.93035200  | -1.29447800 | 7.18744500 |
| H | 2.64703200  | 0.27274400  | 6.49500600 |
| C | 4.35253400  | -2.61752500 | 7.03068100 |
| H | 4.08739500  | -4.43520900 | 5.89721700 |
| H | 4.37179700  | -0.67012900 | 7.95936500 |
| H | 5.12094000  | -3.02918900 | 7.67861800 |

18

E= -880.3313571 a.u.

|   |             |             |             |
|---|-------------|-------------|-------------|
| C | 1.51095000  | -1.54028400 | 0.45367000  |
| C | 0.85887000  | -0.82963200 | 1.63262900  |
| N | 1.73473500  | -0.18421700 | 2.47615300  |
| C | 1.40972000  | 0.42474200  | 3.79129600  |
| C | 2.65134300  | 1.26686500  | 4.20007000  |
| N | 3.34622100  | 1.83280000  | 3.16797900  |
| C | 4.42464600  | 2.77986300  | 3.41937000  |
| H | 1.23841200  | -2.59899600 | 0.48917000  |
| H | 1.09542100  | -1.12794400 | -0.47012000 |
| H | 2.60062200  | -1.45128500 | 0.42503400  |
| O | -0.35974800 | -0.83417400 | 1.77561800  |
| H | 2.69799200  | -0.48048600 | 2.38318000  |
| C | 1.00272200  | -0.71368100 | 4.80837700  |
| C | 0.04811200  | -0.21453200 | 5.94342300  |
| O | 2.97288600  | 1.46365600  | 5.36763900  |
| H | 2.95257300  | 1.77606900  | 2.23968900  |
| H | 4.04622200  | 3.73929200  | 3.79181500  |
| H | 5.10248700  | 2.36976800  | 4.17044700  |
| H | 4.97288400  | 2.94506600  | 2.48945900  |
| C | 0.10552800  | 1.28792800  | 6.25316400  |
| C | -0.08456800 | 2.16155500  | 4.98655000  |
| H | -0.97650000 | -0.46998300 | 5.64592500  |
| H | 0.24700900  | -0.78626800 | 6.85542400  |
| H | -0.66886100 | 1.52790500  | 6.99128600  |
| H | 1.06865500  | 1.52347100  | 6.70896900  |
| H | -1.11603900 | 2.52783000  | 4.92554900  |
| H | 0.55233800  | 3.04976000  | 5.06453700  |
| C | 0.21173800  | 1.40780500  | 3.67132900  |
| H | -0.65405700 | 0.81842300  | 3.36653000  |
| H | 0.40354800  | 2.11902500  | 2.85916200  |
| H | 0.38043700  | -1.35457300 | 4.17764800  |
| C | 2.15635700  | -1.59907500 | 5.26853100  |
| C | 2.44505600  | -2.77104400 | 4.54882100  |
| C | 2.93206500  | -1.32391400 | 6.40729400  |
| C | 3.48109200  | -3.62883800 | 4.93198300  |

|   |            |             |            |
|---|------------|-------------|------------|
| H | 1.83243400 | -3.03015200 | 3.68831000 |
| C | 3.96293800 | -2.18058000 | 6.79819900 |
| H | 2.74216600 | -0.42488200 | 6.98128000 |
| C | 4.24727700 | -3.33416700 | 6.06089500 |
| H | 3.67531300 | -4.53099400 | 4.35813500 |
| H | 4.54817400 | -1.94342400 | 7.68250400 |
| H | 5.04898100 | -3.99911900 | 6.36958300 |

19

E= -880.332319 a.u.

|   |             |             |             |
|---|-------------|-------------|-------------|
| C | 0.39320600  | 0.23141800  | -0.09541100 |
| C | 0.25216000  | 0.26050200  | 1.41964200  |
| N | 1.43342600  | 0.25617600  | 2.12568400  |
| C | 1.52503100  | 0.04885500  | 3.59350700  |
| C | 0.75798500  | 1.18995400  | 4.32006700  |
| N | 0.86524100  | 2.42466000  | 3.76809700  |
| C | 0.16592800  | 3.56803400  | 4.33408200  |
| H | -0.01721900 | -0.71375800 | -0.46436600 |
| H | -0.21113400 | 1.03762100  | -0.51882700 |
| H | 1.42410300  | 0.33053000  | -0.44794200 |
| O | -0.84466500 | 0.31130800  | 1.96362000  |
| H | 2.27343000  | 0.06946100  | 1.59489800  |
| C | 3.08494400  | 0.09529900  | 3.93383100  |
| C | 3.63335600  | -1.34542700 | 4.09716400  |
| O | 0.15933000  | 0.98457400  | 5.37287300  |
| H | 1.23615800  | 2.49015300  | 2.83227300  |
| H | -0.91567800 | 3.50218700  | 4.16652800  |
| H | 0.34381800  | 3.60845200  | 5.41067100  |
| H | 0.54890400  | 4.48053800  | 3.87190200  |
| C | 2.96551600  | -2.14655900 | 5.22939600  |
| C | 1.43003900  | -1.93649300 | 5.26375700  |
| H | 3.48468700  | -1.87397100 | 3.14579200  |
| H | 4.71657700  | -1.29456500 | 4.25351800  |
| H | 3.20530500  | -3.20668500 | 5.08491800  |
| H | 3.40688200  | -1.86402200 | 6.19090900  |
| H | 0.92124300  | -2.89157600 | 5.43632400  |
| H | 1.13975600  | -1.28749900 | 6.09360400  |
| C | 0.89346200  | -1.32645500 | 3.96340100  |
| H | 1.09854900  | -2.01074000 | 3.13099200  |
| H | -0.18909900 | -1.20622900 | 4.01917900  |
| H | 3.56093100  | 0.50307700  | 3.03410400  |
| C | 3.57336100  | 1.01959800  | 5.05038900  |
| C | 4.61134000  | 1.91760100  | 4.74760600  |
| C | 3.11201000  | 0.98098400  | 6.37610000  |
| C | 5.17350500  | 2.74433000  | 5.72254700  |
| H | 4.98907200  | 1.97058000  | 3.72857300  |
| C | 3.66816900  | 1.80935300  | 7.35436800  |
| H | 2.29265300  | 0.32957000  | 6.64979800  |
| C | 4.70210100  | 2.69243200  | 7.03595900  |
| H | 5.97448400  | 3.42750600  | 5.45388600  |
| H | 3.28435800  | 1.76347700  | 8.36965400  |
| H | 5.13174700  | 3.33369400  | 7.80018500  |

20

E= -880.3319589 a.u.

|   |            |             |            |
|---|------------|-------------|------------|
| C | 0.29548000 | 0.21277000  | 0.06451900 |
| C | 0.22622600 | -0.05346000 | 1.55878000 |
| N | 1.44083400 | -0.05989700 | 2.20841900 |
| C | 1.54017300 | 0.03370700  | 3.67835500 |
| C | 0.92102300 | 1.40721800  | 4.07858800 |

|   |             |             |             |
|---|-------------|-------------|-------------|
| N | 0.31452700  | 1.49957200  | 5.28530900  |
| C | -0.24761400 | 2.75824600  | 5.75631000  |
| H | -0.46630900 | -0.38772200 | -0.43624000 |
| H | 0.06194800  | 1.26917200  | -0.10811800 |
| H | 1.27645900  | -0.00396500 | -0.36841300 |
| O | -0.83974100 | -0.25273700 | 2.13276800  |
| H | 2.17885200  | 0.41618500  | 1.70595100  |
| C | 3.10541500  | 0.04179900  | 4.00408000  |
| C | 3.63072400  | -1.41277000 | 4.05281400  |
| O | 1.03665600  | 2.38009500  | 3.33220000  |
| H | 0.20033700  | 0.67489400  | 5.85175500  |
| H | 0.51745600  | 3.53945000  | 5.76026300  |
| H | -1.06847100 | 3.08586600  | 5.11031800  |
| H | -0.62223500 | 2.61527300  | 6.77162900  |
| C | 2.93195300  | -2.34488000 | 5.08008300  |
| C | 1.55537300  | -1.80918700 | 5.50746100  |
| H | 3.48849000  | -1.83010100 | 3.04994500  |
| H | 4.71201500  | -1.39192700 | 4.22571300  |
| H | 2.79931000  | -3.33152500 | 4.61988900  |
| H | 3.56555400  | -2.50955300 | 5.95851500  |
| H | 0.95103000  | -2.62040500 | 5.92930100  |
| H | 1.66921600  | -1.06625100 | 6.30724000  |
| C | 0.82252200  | -1.20405400 | 4.30581000  |
| H | 0.75694000  | -1.96864200 | 3.52618800  |
| H | -0.21402100 | -0.95346400 | 4.54006600  |
| H | 3.56204200  | 0.49831300  | 3.11784200  |
| C | 3.58178500  | 0.94271000  | 5.15148800  |
| C | 3.76988900  | 2.31331400  | 4.89396200  |
| C | 3.92898200  | 0.47336800  | 6.42815600  |
| C | 4.25312000  | 3.18086500  | 5.87432300  |
| H | 3.51955100  | 2.70879800  | 3.91461100  |
| C | 4.41757500  | 1.33766000  | 7.41335200  |
| H | 3.84051700  | -0.57803200 | 6.67012600  |
| C | 4.57712100  | 2.69749400  | 7.14461100  |
| H | 4.38302600  | 4.23377500  | 5.64004000  |
| H | 4.67973700  | 0.93964700  | 8.38984500  |
| H | 4.95912900  | 3.36840100  | 7.90869100  |

21

E= -880.3319945 a.u.

|   |             |             |             |
|---|-------------|-------------|-------------|
| C | -0.49428800 | -0.01220300 | 0.44952500  |
| C | -0.15615300 | 0.15427600  | 1.91984600  |
| N | 1.18531400  | 0.26118900  | 2.20436900  |
| C | 1.73917400  | 0.06544100  | 3.55294000  |
| C | 1.35773800  | -1.39711900 | 3.98689900  |
| N | 1.50732500  | -1.74640500 | 5.28930400  |
| C | 1.21844400  | -3.10623400 | 5.72894400  |
| H | -0.63544000 | -1.08043400 | 0.25128400  |
| H | -1.43527700 | 0.50010300  | 0.24120600  |
| H | 0.28591400  | 0.36615900  | -0.21779200 |
| O | -1.02948800 | 0.20382800  | 2.78267400  |
| H | 1.79383500  | -0.03787100 | 1.45398400  |
| C | 1.27315000  | 1.31120800  | 4.44509100  |
| C | 2.32653900  | 2.44291100  | 4.34364800  |
| O | 1.09236700  | -2.23090400 | 3.12212800  |
| H | 1.52454900  | -1.01842700 | 5.98891600  |
| H | 0.14759500  | -3.33232500 | 5.66740300  |
| H | 1.75151200  | -3.82008300 | 5.09744600  |
| H | 1.55153000  | -3.21604200 | 6.76308600  |
| C | 3.77251000  | 2.07947900  | 4.76482800  |
| C | 4.05082000  | 0.57489500  | 4.59489600  |

|   |             |             |            |
|---|-------------|-------------|------------|
| H | 2.33960000  | 2.75494000  | 3.29286900 |
| H | 1.96799700  | 3.30911400  | 4.90999800 |
| H | 4.46983600  | 2.64816100  | 4.13701200 |
| H | 3.98005900  | 2.39153700  | 5.79404400 |
| H | 5.12484400  | 0.39322700  | 4.47700100 |
| H | 3.74519200  | 0.01622200  | 5.48741400 |
| C | 3.29771200  | 0.03990900  | 3.37585800 |
| H | 3.55149400  | 0.67000600  | 2.51288100 |
| H | 3.61358500  | -0.97849300 | 3.12725200 |
| H | 0.39731600  | 1.68062500  | 3.91350300 |
| C | 0.74577100  | 1.06039400  | 5.86044300 |
| C | -0.61657300 | 0.73497500  | 6.01206900 |
| C | 1.51730900  | 1.19437800  | 7.02792300 |
| C | -1.17740700 | 0.53746300  | 7.27432500 |
| H | -1.22639900 | 0.62450100  | 5.12056900 |
| C | 0.95629800  | 0.99579000  | 8.29555900 |
| H | 2.56489100  | 1.46297900  | 6.96548100 |
| C | -0.39283500 | 0.66401800  | 8.42519800 |
| H | -2.23135800 | 0.28716500  | 7.35815600 |
| H | 1.57824900  | 1.10988000  | 9.17923200 |
| H | -0.82904100 | 0.51317100  | 9.40848700 |
